# Supplementary material for: Oxygen isotopes in orangutan teeth reveal recent and ancient climate variation
Source: eLife. 2024 Mar 8;12:RP90217. doi: 10.7554/eLife.90217 (PMC10942278; doi:10.7554/eLife.90217)
Supplement: Source data 1. [file elife-90217-data1.xlsx]

## Sheet: Sheet1
tooth	ID	molar	day	d18O	age	year	region
MCZ01_1	MCZ01	1	0	17.03	modern	1	Borneo
MCZ01_1	MCZ01	1	7	16.83	modern	1	Borneo
MCZ01_1	MCZ01	1	14	15.14	modern	1	Borneo
MCZ01_1	MCZ01	1	22	14.88	modern	1	Borneo
MCZ01_1	MCZ01	1	29	16.17	modern	1	Borneo
MCZ01_1	MCZ01	1	36	16.63	modern	1	Borneo
MCZ01_1	MCZ01	1	42	16.55	modern	1	Borneo
MCZ01_1	MCZ01	1	48	16.16	modern	1	Borneo
MCZ01_1	MCZ01	1	53	15.79	modern	1	Borneo
MCZ01_1	MCZ01	1	59	16.71	modern	1	Borneo
MCZ01_1	MCZ01	1	65	16.33	modern	1	Borneo
MCZ01_1	MCZ01	1	71	16.5	modern	1	Borneo
MCZ01_1	MCZ01	1	77	16.55	modern	1	Borneo
MCZ01_1	MCZ01	1	82	16.04	modern	1	Borneo
MCZ01_1	MCZ01	1	88	16.45	modern	1	Borneo
MCZ01_1	MCZ01	1	94	15.82	modern	1	Borneo
MCZ01_1	MCZ01	1	100	16.37	modern	1	Borneo
MCZ01_1	MCZ01	1	106	15.42	modern	1	Borneo
MCZ01_1	MCZ01	1	111	16.04	modern	1	Borneo
MCZ01_1	MCZ01	1	117	16.21	modern	1	Borneo
MCZ01_1	MCZ01	1	123	16.09	modern	1	Borneo
MCZ01_1	MCZ01	1	129	16.84	modern	1	Borneo
MCZ01_1	MCZ01	1	135	16.84	modern	1	Borneo
MCZ01_1	MCZ01	1	140	16.66	modern	1	Borneo
MCZ01_1	MCZ01	1	146	16.64	modern	1	Borneo
MCZ01_1	MCZ01	1	152	16.16	modern	1	Borneo
MCZ01_1	MCZ01	1	158	16.78	modern	1	Borneo
MCZ01_1	MCZ01	1	164	16.54	modern	1	Borneo
MCZ01_1	MCZ01	1	169	16.23	modern	1	Borneo
MCZ01_1	MCZ01	1	175	16.17	modern	1	Borneo
MCZ01_1	MCZ01	1	181	16.61	modern	1	Borneo
MCZ01_1	MCZ01	1	187	16.99	modern	1	Borneo
MCZ01_1	MCZ01	1	193	16.52	modern	1	Borneo
MCZ01_1	MCZ01	1	198	16.42	modern	1	Borneo
MCZ01_1	MCZ01	1	204	16.57	modern	1	Borneo
MCZ01_1	MCZ01	1	210	16.04	modern	1	Borneo
MCZ01_1	MCZ01	1	216	16.58	modern	1	Borneo
MCZ01_1	MCZ01	1	222	16.69	modern	1	Borneo
MCZ01_1	MCZ01	1	227	17.29	modern	1	Borneo
MCZ01_1	MCZ01	1	233	17.45	modern	1	Borneo
MCZ01_1	MCZ01	1	239	18.1	modern	1	Borneo
MCZ01_1	MCZ01	1	245	17.63	modern	1	Borneo
MCZ01_1	MCZ01	1	251	18.05	modern	1	Borneo
MCZ01_1	MCZ01	1	256	17.04	modern	1	Borneo
MCZ01_1	MCZ01	1	262	17.13	modern	1	Borneo
MCZ01_1	MCZ01	1	268	16.49	modern	1	Borneo
MCZ01_1	MCZ01	1	277	16.88	modern	1	Borneo
MCZ01_1	MCZ01	1	286	17.29	modern	1	Borneo
MCZ01_1	MCZ01	1	295	17.03	modern	1	Borneo
MCZ01_1	MCZ01	1	304	16.95	modern	1	Borneo
MCZ01_1	MCZ01	1	313	17.13	modern	1	Borneo
MCZ01_1	MCZ01	1	322	17.44	modern	1	Borneo
MCZ01_1	MCZ01	1	331	17.12	modern	1	Borneo
MCZ01_1	MCZ01	1	340	16.87	modern	1	Borneo
MCZ01_1	MCZ01	1	349	16.83	modern	1	Borneo
MCZ01_1	MCZ01	1	358	16.87	modern	1	Borneo
MCZ01_1	MCZ01	1	367	16.88	modern	2	Borneo
MCZ01_1	MCZ01	1	376	17.82	modern	2	Borneo
MCZ01_1	MCZ01	1	386	17.89	modern	2	Borneo
MCZ01_1	MCZ01	1	395	17.5	modern	2	Borneo
MCZ01_1	MCZ01	1	404	17.21	modern	2	Borneo
MCZ01_1	MCZ01	1	413	16.66	modern	2	Borneo
MCZ01_1	MCZ01	1	422	16.15	modern	2	Borneo
MCZ01_1	MCZ01	1	431	16.32	modern	2	Borneo
MCZ01_1	MCZ01	1	440	16.79	modern	2	Borneo
MCZ01_1	MCZ01	1	449	17.18	modern	2	Borneo
MCZ01_1	MCZ01	1	458	17.01	modern	2	Borneo
MCZ01_1	MCZ01	1	467	17.13	modern	2	Borneo
MCZ01_1	MCZ01	1	476	17.33	modern	2	Borneo
MCZ01_1	MCZ01	1	485	17.02	modern	2	Borneo
MCZ01_1	MCZ01	1	494	17.49	modern	2	Borneo
MCZ01_1	MCZ01	1	498	17.65	modern	2	Borneo
MCZ01_1	MCZ01	1	503	17.48	modern	2	Borneo
MCZ01_1	MCZ01	1	507	16.65	modern	2	Borneo
MCZ01_1	MCZ01	1	512	16.09	modern	2	Borneo
MCZ01_1	MCZ01	1	516	16.33	modern	2	Borneo
MCZ01_1	MCZ01	1	521	16.2	modern	2	Borneo
MCZ01_1	MCZ01	1	525	15.97	modern	2	Borneo
MCZ01_1	MCZ01	1	530	15.9	modern	2	Borneo
MCZ01_1	MCZ01	1	534	16.39	modern	2	Borneo
MCZ01_1	MCZ01	1	538	16.35	modern	2	Borneo
MCZ01_1	MCZ01	1	543	15.81	modern	2	Borneo
MCZ01_1	MCZ01	1	547	16.37	modern	2	Borneo
MCZ01_1	MCZ01	1	552	15.49	modern	2	Borneo
MCZ01_1	MCZ01	1	556	15.62	modern	2	Borneo
MCZ01_1	MCZ01	1	561	15.76	modern	2	Borneo
MCZ01_1	MCZ01	1	565	15.54	modern	2	Borneo
MCZ01_1	MCZ01	1	570	15.21	modern	2	Borneo
MCZ01_1	MCZ01	1	574	14.85	modern	2	Borneo
MCZ01_1	MCZ01	1	582	14.98	modern	2	Borneo
MCZ01_1	MCZ01	1	590	15.4	modern	2	Borneo
MCZ01_1	MCZ01	1	598	15.07	modern	2	Borneo
MCZ01_1	MCZ01	1	606	15.16	modern	2	Borneo
MCZ01_1	MCZ01	1	614	16.06	modern	2	Borneo
MCZ01_1	MCZ01	1	622	15.59	modern	2	Borneo
MCZ01_1	MCZ01	1	630	15.94	modern	2	Borneo
MCZ01_1	MCZ01	1	638	15.82	modern	2	Borneo
MCZ01_1	MCZ01	1	645	15.49	modern	2	Borneo
MCZ01_1	MCZ01	1	653	16.02	modern	2	Borneo
MCZ01_1	MCZ01	1	661	15.13	modern	2	Borneo
MCZ01_1	MCZ01	1	669	14.98	modern	2	Borneo
MCZ01_1	MCZ01	1	677	16.29	modern	2	Borneo
MCZ01_1	MCZ01	1	685	16.08	modern	2	Borneo
MCZ01_1	MCZ01	1	693	16	modern	2	Borneo
MCZ01_1	MCZ01	1	701	15.22	modern	2	Borneo
MCZ01_1	MCZ01	1	709	15.23	modern	2	Borneo
MCZ01_1	MCZ01	1	717	15.19	modern	2	Borneo
MCZ01_1	MCZ01	1	725	15.18	modern	2	Borneo
ZMB01_1	ZMB01	1	0	13.42	modern	1	Sumatra
ZMB01_1	ZMB01	1	6	14.88	modern	1	Sumatra
ZMB01_1	ZMB01	1	12	14.86	modern	1	Sumatra
ZMB01_1	ZMB01	1	17	15.89	modern	1	Sumatra
ZMB01_1	ZMB01	1	23	13.74	modern	1	Sumatra
ZMB01_1	ZMB01	1	29	15.42	modern	1	Sumatra
ZMB01_1	ZMB01	1	35	15.14	modern	1	Sumatra
ZMB01_1	ZMB01	1	41	16.37	modern	1	Sumatra
ZMB01_1	ZMB01	1	47	15.31	modern	1	Sumatra
ZMB01_1	ZMB01	1	52	17.04	modern	1	Sumatra
ZMB01_1	ZMB01	1	58	17.04	modern	1	Sumatra
ZMB01_1	ZMB01	1	64	18.19	modern	1	Sumatra
ZMB01_1	ZMB01	1	70	18.64	modern	1	Sumatra
ZMB01_1	ZMB01	1	76	17.74	modern	1	Sumatra
ZMB01_1	ZMB01	1	82	18.18	modern	1	Sumatra
ZMB01_1	ZMB01	1	87	17.57	modern	1	Sumatra
ZMB01_1	ZMB01	1	93	18.57	modern	1	Sumatra
ZMB01_1	ZMB01	1	99	18.02	modern	1	Sumatra
ZMB01_1	ZMB01	1	105	17.81	modern	1	Sumatra
ZMB01_1	ZMB01	1	111	17.45	modern	1	Sumatra
ZMB01_1	ZMB01	1	117	17.78	modern	1	Sumatra
ZMB01_1	ZMB01	1	122	18.03	modern	1	Sumatra
ZMB01_1	ZMB01	1	128	18.37	modern	1	Sumatra
ZMB01_1	ZMB01	1	134	20.27	modern	1	Sumatra
ZMB01_1	ZMB01	1	140	19.25	modern	1	Sumatra
ZMB01_1	ZMB01	1	146	19.6	modern	1	Sumatra
ZMB01_1	ZMB01	1	152	19.57	modern	1	Sumatra
ZMB01_1	ZMB01	1	157	19.7	modern	1	Sumatra
ZMB01_1	ZMB01	1	163	19.57	modern	1	Sumatra
ZMB01_1	ZMB01	1	169	20	modern	1	Sumatra
ZMB01_1	ZMB01	1	179	18.99	modern	1	Sumatra
ZMB01_1	ZMB01	1	189	19.91	modern	1	Sumatra
ZMB01_1	ZMB01	1	199	19.83	modern	1	Sumatra
ZMB01_1	ZMB01	1	209	19.8	modern	1	Sumatra
ZMB01_1	ZMB01	1	219	19.6	modern	1	Sumatra
ZMB01_1	ZMB01	1	229	19.72	modern	1	Sumatra
ZMB01_1	ZMB01	1	239	20.44	modern	1	Sumatra
ZMB01_1	ZMB01	1	249	19.54	modern	1	Sumatra
ZMB01_1	ZMB01	1	259	19.89	modern	1	Sumatra
ZMB01_1	ZMB01	1	269	18.42	modern	1	Sumatra
ZMB01_1	ZMB01	1	279	18.62	modern	1	Sumatra
ZMB01_1	ZMB01	1	289	18.54	modern	1	Sumatra
ZMB01_1	ZMB01	1	299	18.97	modern	1	Sumatra
ZMB01_1	ZMB01	1	309	18.34	modern	1	Sumatra
ZMB01_1	ZMB01	1	319	18.86	modern	1	Sumatra
ZMB01_1	ZMB01	1	329	18.73	modern	1	Sumatra
ZMB01_1	ZMB01	1	339	18.09	modern	1	Sumatra
ZMB01_1	ZMB01	1	349	17.84	modern	1	Sumatra
ZMB01_1	ZMB01	1	359	17.62	modern	1	Sumatra
ZMB01_1	ZMB01	1	370	17.99	modern	2	Sumatra
ZMB01_1	ZMB01	1	380	18.21	modern	2	Sumatra
ZMB01_1	ZMB01	1	391	16.07	modern	2	Sumatra
ZMB01_1	ZMB01	1	401	15.68	modern	2	Sumatra
ZMB01_1	ZMB01	1	412	16.32	modern	2	Sumatra
ZMB01_1	ZMB01	1	422	15.9	modern	2	Sumatra
ZMB01_1	ZMB01	1	432	15.03	modern	2	Sumatra
ZMB01_1	ZMB01	1	443	15.27	modern	2	Sumatra
ZMB01_1	ZMB01	1	453	15.79	modern	2	Sumatra
ZMB01_1	ZMB01	1	464	15.77	modern	2	Sumatra
ZMB01_1	ZMB01	1	474	15.85	modern	2	Sumatra
ZMB01_1	ZMB01	1	480	16.86	modern	2	Sumatra
ZMB01_1	ZMB01	1	487	16.9	modern	2	Sumatra
ZMB01_1	ZMB01	1	493	17.37	modern	2	Sumatra
ZMB01_1	ZMB01	1	500	17.68	modern	2	Sumatra
ZMB01_1	ZMB01	1	506	17.55	modern	2	Sumatra
ZMB01_1	ZMB01	1	512	18.35	modern	2	Sumatra
ZMB01_1	ZMB01	1	519	17.85	modern	2	Sumatra
ZMB01_1	ZMB01	1	525	17.39	modern	2	Sumatra
ZMB01_1	ZMB01	1	532	17.47	modern	2	Sumatra
ZMB01_1	ZMB01	1	538	17.49	modern	2	Sumatra
ZMB01_1	ZMB01	1	545	17.67	modern	2	Sumatra
ZMB01_1	ZMB01	1	551	18.08	modern	2	Sumatra
ZMB01_1	ZMB01	1	557	17.43	modern	2	Sumatra
ZMB01_1	ZMB01	1	564	17.08	modern	2	Sumatra
ZMB01_1	ZMB01	1	570	16.52	modern	2	Sumatra
ZMB01_1	ZMB01	1	577	17.22	modern	2	Sumatra
ZMB01_1	ZMB01	1	583	17.52	modern	2	Sumatra
ZMB01_1	ZMB01	1	589	17.11	modern	2	Sumatra
ZMB01_1	ZMB01	1	596	16.75	modern	2	Sumatra
ZMB01_1	ZMB01	1	602	17.23	modern	2	Sumatra
ZMB01_1	ZMB01	1	609	17.66	modern	2	Sumatra
ZMB01_1	ZMB01	1	615	16.57	modern	2	Sumatra
ZMB01_1	ZMB01	1	625	16.6	modern	2	Sumatra
ZMB01_1	ZMB01	1	634	17.6	modern	2	Sumatra
ZMB01_1	ZMB01	1	644	17.83	modern	2	Sumatra
ZMB01_1	ZMB01	1	653	17.5	modern	2	Sumatra
ZMB01_1	ZMB01	1	663	17.77	modern	2	Sumatra
ZMB01_1	ZMB01	1	672	18	modern	2	Sumatra
ZMB01_1	ZMB01	1	682	17.77	modern	2	Sumatra
ZMB01_1	ZMB01	1	691	17.71	modern	2	Sumatra
ZMB01_1	ZMB01	1	701	17.98	modern	2	Sumatra
ZMB01_1	ZMB01	1	710	18.26	modern	2	Sumatra
ZMB01_1	ZMB01	1	720	17.05	modern	2	Sumatra
ZMB01_1	ZMB01	1	729	16.1	modern	2	Sumatra
ZSM01_1	ZSM01	1	0	13.77	modern	1	Borneo
ZSM01_1	ZSM01	1	7	13.59	modern	1	Borneo
ZSM01_1	ZSM01	1	14	14.48	modern	1	Borneo
ZSM01_1	ZSM01	1	20	14.66	modern	1	Borneo
ZSM01_1	ZSM01	1	27	14.36	modern	1	Borneo
ZSM01_1	ZSM01	1	34	14.37	modern	1	Borneo
ZSM01_1	ZSM01	1	41	14.49	modern	1	Borneo
ZSM01_1	ZSM01	1	47	14.6	modern	1	Borneo
ZSM01_1	ZSM01	1	54	14.32	modern	1	Borneo
ZSM01_1	ZSM01	1	61	13.71	modern	1	Borneo
ZSM01_1	ZSM01	1	68	14.33	modern	1	Borneo
ZSM01_1	ZSM01	1	74	15.58	modern	1	Borneo
ZSM01_1	ZSM01	1	81	15.82	modern	1	Borneo
ZSM01_1	ZSM01	1	88	16.21	modern	1	Borneo
ZSM01_1	ZSM01	1	95	15.72	modern	1	Borneo
ZSM01_1	ZSM01	1	102	15.33	modern	1	Borneo
ZSM01_1	ZSM01	1	109	14.28	modern	1	Borneo
ZSM01_1	ZSM01	1	116	15.9	modern	1	Borneo
ZSM01_1	ZSM01	1	123	15.12	modern	1	Borneo
ZSM01_1	ZSM01	1	130	15.4	modern	1	Borneo
ZSM01_1	ZSM01	1	137	16	modern	1	Borneo
ZSM01_1	ZSM01	1	144	15.23	modern	1	Borneo
ZSM01_1	ZSM01	1	151	16.17	modern	1	Borneo
ZSM01_1	ZSM01	1	158	16.14	modern	1	Borneo
ZSM01_1	ZSM01	1	164	15.8	modern	1	Borneo
ZSM01_1	ZSM01	1	171	15.81	modern	1	Borneo
ZSM01_1	ZSM01	1	178	15.24	modern	1	Borneo
ZSM01_1	ZSM01	1	185	15.43	modern	1	Borneo
ZSM01_1	ZSM01	1	192	14.2	modern	1	Borneo
ZSM01_1	ZSM01	1	199	14.77	modern	1	Borneo
ZSM01_1	ZSM01	1	206	14.72	modern	1	Borneo
ZSM01_1	ZSM01	1	213	14.18	modern	1	Borneo
ZSM01_1	ZSM01	1	220	15.03	modern	1	Borneo
ZSM01_1	ZSM01	1	227	15.41	modern	1	Borneo
ZSM01_1	ZSM01	1	238	16.22	modern	1	Borneo
ZSM01_1	ZSM01	1	250	16.24	modern	1	Borneo
ZSM01_1	ZSM01	1	261	16.52	modern	1	Borneo
ZSM01_1	ZSM01	1	272	16.03	modern	1	Borneo
ZSM01_1	ZSM01	1	284	17.09	modern	1	Borneo
ZSM01_1	ZSM01	1	295	17.53	modern	1	Borneo
ZSM01_1	ZSM01	1	306	17.5	modern	1	Borneo
ZSM01_1	ZSM01	1	318	16.79	modern	1	Borneo
ZSM01_1	ZSM01	1	329	15.29	modern	1	Borneo
ZSM01_1	ZSM01	1	340	16.76	modern	1	Borneo
ZSM01_1	ZSM01	1	351	16.64	modern	1	Borneo
ZSM01_1	ZSM01	1	363	16.48	modern	1	Borneo
ZSM01_1	ZSM01	1	374	16.25	modern	2	Borneo
ZSM01_1	ZSM01	1	385	15.67	modern	2	Borneo
ZSM01_1	ZSM01	1	397	15.46	modern	2	Borneo
ZSM01_1	ZSM01	1	408	15.22	modern	2	Borneo
ZSM01_1	ZSM01	1	419	14.91	modern	2	Borneo
ZSM01_1	ZSM01	1	431	15.78	modern	2	Borneo
ZSM01_1	ZSM01	1	442	15.25	modern	2	Borneo
ZSM01_1	ZSM01	1	454	15.39	modern	2	Borneo
ZSM01_1	ZSM01	1	465	15.32	modern	2	Borneo
ZSM01_1	ZSM01	1	476	15.67	modern	2	Borneo
ZSM01_1	ZSM01	1	488	15.41	modern	2	Borneo
ZSM01_1	ZSM01	1	499	14.97	modern	2	Borneo
ZSM01_1	ZSM01	1	511	15.32	modern	2	Borneo
ZSM01_1	ZSM01	1	522	14.87	modern	2	Borneo
ZSM01_1	ZSM01	1	533	15.28	modern	2	Borneo
ZSM01_1	ZSM01	1	545	15.19	modern	2	Borneo
ZSM01_1	ZSM01	1	556	15.18	modern	2	Borneo
ZSM01_1	ZSM01	1	568	14.71	modern	2	Borneo
ZSM01_1	ZSM01	1	579	14.67	modern	2	Borneo
ZSM01_1	ZSM01	1	593	14.74	modern	2	Borneo
ZSM01_1	ZSM01	1	606	14.3	modern	2	Borneo
ZSM01_1	ZSM01	1	620	14.31	modern	2	Borneo
ZSM01_1	ZSM01	1	633	13.76	modern	2	Borneo
ZSM01_1	ZSM01	1	647	14.24	modern	2	Borneo
ZSM01_1	ZSM01	1	660	15.21	modern	2	Borneo
ZSM01_1	ZSM01	1	674	14.61	modern	2	Borneo
ZSM01_1	ZSM01	1	687	15.02	modern	2	Borneo
ZSM01_1	ZSM01	1	701	14.36	modern	2	Borneo
ZSM01_1	ZSM01	1	714	13.9	modern	2	Borneo
ZSM01_1	ZSM01	1	728	14.28	modern	2	Borneo
ZSM01_1	ZSM01	1	741	14.9	modern	3	Borneo
ZSM01_1	ZSM01	1	755	14.95	modern	3	Borneo
ZSM01_1	ZSM01	1	768	14.59	modern	3	Borneo
ZSM01_1	ZSM01	1	782	15.36	modern	3	Borneo
ZSM01_1	ZSM01	1	795	15.16	modern	3	Borneo
ZSM01_1	ZSM01	1	809	14.92	modern	3	Borneo
ZSM01_1	ZSM01	1	822	16.17	modern	3	Borneo
ZSM01_1	ZSM01	1	833	14.41	modern	3	Borneo
ZSM01_1	ZSM01	1	843	14.44	modern	3	Borneo
ZSM01_1	ZSM01	1	854	15.09	modern	3	Borneo
ZSM01_1	ZSM01	1	865	14.32	modern	3	Borneo
ZSM01_1	ZSM01	1	875	15.59	modern	3	Borneo
ZSM01_1	ZSM01	1	886	16.65	modern	3	Borneo
ZSM01_1	ZSM01	1	896	15.3	modern	3	Borneo
ZSM01_1	ZSM01	1	907	14.59	modern	3	Borneo
ZSM01_1	ZSM01	1	918	14.27	modern	3	Borneo
ZSM01_1	ZSM01	1	928	15.24	modern	3	Borneo
ZSM01_1	ZSM01	1	939	15.78	modern	3	Borneo
ZSM01_1	ZSM01	1	945	15.84	modern	3	Borneo
ZSM01_1	ZSM01	1	952	14.89	modern	3	Borneo
ZSM01_1	ZSM01	1	958	14.61	modern	3	Borneo
ZSM01_1	ZSM01	1	965	15.46	modern	3	Borneo
ZSM01_1	ZSM01	1	971	15.37	modern	3	Borneo
ZSM01_1	ZSM01	1	978	15.08	modern	3	Borneo
ZSM01_1	ZSM01	1	984	15.36	modern	3	Borneo
ZSM01_1	ZSM01	1	990	14.74	modern	3	Borneo
ZSM01_1	ZSM01	1	997	15.18	modern	3	Borneo
ZSM01_1	ZSM01	1	1003	14.76	modern	3	Borneo
ZSM01_1	ZSM01	1	1010	14	modern	3	Borneo
ZSM01_1	ZSM01	1	1016	13.6	modern	3	Borneo
ZSM01_1	ZSM01	1	1023	17.02	modern	3	Borneo
ZSM01_1	ZSM01	1	1029	15.45	modern	3	Borneo
ZSM01_1	ZSM01	1	1034	18.18	modern	3	Borneo
ZSM01_1	ZSM01	1	1039	17.97	modern	3	Borneo
ZSM01_1	ZSM01	1	1044	18.3	modern	3	Borneo
ZSM01_1	ZSM01	1	1049	17.2	modern	3	Borneo
ZSM01_1	ZSM01	1	1054	17.19	modern	3	Borneo
ZSM01_1	ZSM01	1	1059	17.33	modern	3	Borneo
ZSM01_1	ZSM01	1	1064	17.14	modern	3	Borneo
ZSM01_1	ZSM01	1	1068	17.19	modern	3	Borneo
ZSM01_1	ZSM01	1	1073	16.62	modern	3	Borneo
ZSM01_1	ZSM01	1	1078	16.85	modern	3	Borneo
ZSM01_1	ZSM01	1	1083	16.88	modern	3	Borneo
ZSM01_1	ZSM01	1	1088	16.77	modern	3	Borneo
ZSM01_1	ZSM01	1	1093	16.67	modern	3	Borneo
ZSM01_2	ZSM01	2	0	15.45	modern	1	Borneo
ZSM01_2	ZSM01	2	8	15.98	modern	1	Borneo
ZSM01_2	ZSM01	2	16	15.49	modern	1	Borneo
ZSM01_2	ZSM01	2	24	18.85	modern	1	Borneo
ZSM01_2	ZSM01	2	32	17.68	modern	1	Borneo
ZSM01_2	ZSM01	2	40	17.34	modern	1	Borneo
ZSM01_2	ZSM01	2	48	15.6	modern	1	Borneo
ZSM01_2	ZSM01	2	56	16.03	modern	1	Borneo
ZSM01_2	ZSM01	2	64	16.94	modern	1	Borneo
ZSM01_2	ZSM01	2	72	15.57	modern	1	Borneo
ZSM01_2	ZSM01	2	81	15.69	modern	1	Borneo
ZSM01_2	ZSM01	2	89	15.01	modern	1	Borneo
ZSM01_2	ZSM01	2	97	15.43	modern	1	Borneo
ZSM01_2	ZSM01	2	105	16.09	modern	1	Borneo
ZSM01_2	ZSM01	2	113	15.94	modern	1	Borneo
ZSM01_2	ZSM01	2	121	15.4	modern	1	Borneo
ZSM01_2	ZSM01	2	129	15.38	modern	1	Borneo
ZSM01_2	ZSM01	2	137	16.02	modern	1	Borneo
ZSM01_2	ZSM01	2	145	16.45	modern	1	Borneo
ZSM01_2	ZSM01	2	153	16.18	modern	1	Borneo
ZSM01_2	ZSM01	2	161	16	modern	1	Borneo
ZSM01_2	ZSM01	2	169	15.44	modern	1	Borneo
ZSM01_2	ZSM01	2	177	16.2	modern	1	Borneo
ZSM01_2	ZSM01	2	185	16.05	modern	1	Borneo
ZSM01_2	ZSM01	2	193	15.45	modern	1	Borneo
ZSM01_2	ZSM01	2	200	15.98	modern	1	Borneo
ZSM01_2	ZSM01	2	208	16.24	modern	1	Borneo
ZSM01_2	ZSM01	2	216	16.2	modern	1	Borneo
ZSM01_2	ZSM01	2	224	16.66	modern	1	Borneo
ZSM01_2	ZSM01	2	232	16.8	modern	1	Borneo
ZSM01_2	ZSM01	2	240	16.68	modern	1	Borneo
ZSM01_2	ZSM01	2	248	17.45	modern	1	Borneo
ZSM01_2	ZSM01	2	256	16.16	modern	1	Borneo
ZSM01_2	ZSM01	2	263	15.87	modern	1	Borneo
ZSM01_2	ZSM01	2	271	15.86	modern	1	Borneo
ZSM01_2	ZSM01	2	279	14.78	modern	1	Borneo
ZSM01_2	ZSM01	2	287	14.67	modern	1	Borneo
ZSM01_2	ZSM01	2	295	14.68	modern	1	Borneo
ZSM01_2	ZSM01	2	303	13.85	modern	1	Borneo
ZSM01_2	ZSM01	2	311	13.79	modern	1	Borneo
ZSM01_2	ZSM01	2	319	14.18	modern	1	Borneo
ZSM01_2	ZSM01	2	326	14.26	modern	1	Borneo
ZSM01_2	ZSM01	2	334	14.39	modern	1	Borneo
ZSM01_2	ZSM01	2	342	14.95	modern	1	Borneo
ZSM01_2	ZSM01	2	350	14.71	modern	1	Borneo
ZSM01_2	ZSM01	2	357	16.07	modern	1	Borneo
ZSM01_2	ZSM01	2	365	16.56	modern	1	Borneo
ZSM01_2	ZSM01	2	372	16.92	modern	2	Borneo
ZSM01_2	ZSM01	2	380	17.84	modern	2	Borneo
ZSM01_2	ZSM01	2	387	18.46	modern	2	Borneo
ZSM01_2	ZSM01	2	395	16.96	modern	2	Borneo
ZSM01_2	ZSM01	2	402	16.48	modern	2	Borneo
ZSM01_2	ZSM01	2	409	16.71	modern	2	Borneo
ZSM01_2	ZSM01	2	417	16.87	modern	2	Borneo
ZSM01_2	ZSM01	2	424	16.44	modern	2	Borneo
ZSM01_2	ZSM01	2	432	16.03	modern	2	Borneo
ZSM01_2	ZSM01	2	439	15.57	modern	2	Borneo
ZSM01_2	ZSM01	2	447	15.64	modern	2	Borneo
ZSM01_2	ZSM01	2	454	15.96	modern	2	Borneo
ZSM01_2	ZSM01	2	462	15.35	modern	2	Borneo
ZSM01_2	ZSM01	2	469	15.7	modern	2	Borneo
ZSM01_2	ZSM01	2	476	15.25	modern	2	Borneo
ZSM01_2	ZSM01	2	484	15.11	modern	2	Borneo
ZSM01_2	ZSM01	2	491	15.27	modern	2	Borneo
ZSM01_2	ZSM01	2	499	14.71	modern	2	Borneo
ZSM01_2	ZSM01	2	506	14.93	modern	2	Borneo
ZSM01_2	ZSM01	2	514	14.88	modern	2	Borneo
ZSM01_2	ZSM01	2	521	14.12	modern	2	Borneo
ZSM01_2	ZSM01	2	528	14.36	modern	2	Borneo
ZSM01_2	ZSM01	2	536	14.13	modern	2	Borneo
ZSM01_2	ZSM01	2	543	13.7	modern	2	Borneo
ZSM01_2	ZSM01	2	551	15.04	modern	2	Borneo
ZSM01_2	ZSM01	2	558	14.41	modern	2	Borneo
ZSM01_2	ZSM01	2	566	14.96	modern	2	Borneo
ZSM01_2	ZSM01	2	573	15.86	modern	2	Borneo
ZSM01_2	ZSM01	2	580	15.64	modern	2	Borneo
ZSM01_2	ZSM01	2	588	15.63	modern	2	Borneo
ZSM01_2	ZSM01	2	595	15.3	modern	2	Borneo
ZSM01_2	ZSM01	2	603	14.95	modern	2	Borneo
ZSM01_2	ZSM01	2	610	14.79	modern	2	Borneo
ZSM01_2	ZSM01	2	618	15.03	modern	2	Borneo
ZSM01_2	ZSM01	2	625	15.34	modern	2	Borneo
ZSM01_2	ZSM01	2	633	15.96	modern	2	Borneo
ZSM01_2	ZSM01	2	640	15.52	modern	2	Borneo
ZSM01_2	ZSM01	2	647	15.03	modern	2	Borneo
ZSM01_2	ZSM01	2	655	14.37	modern	2	Borneo
ZSM01_2	ZSM01	2	662	14.49	modern	2	Borneo
ZSM01_2	ZSM01	2	670	14.11	modern	2	Borneo
ZSM01_2	ZSM01	2	677	15.43	modern	2	Borneo
ZSM01_2	ZSM01	2	685	15.09	modern	2	Borneo
ZSM01_2	ZSM01	2	692	13.16	modern	2	Borneo
ZSM01_2	ZSM01	2	699	14.79	modern	2	Borneo
ZSM01_2	ZSM01	2	706	13.84	modern	2	Borneo
ZSM01_2	ZSM01	2	713	14.39	modern	2	Borneo
ZSM01_2	ZSM01	2	720	13.92	modern	2	Borneo
ZSM01_2	ZSM01	2	727	13.35	modern	2	Borneo
ZSM02_1	ZSM02	1	0	14.06	modern	1	Borneo
ZSM02_1	ZSM02	1	5.54	13.91	modern	1	Borneo
ZSM02_1	ZSM02	1	11.08	13.68	modern	1	Borneo
ZSM02_1	ZSM02	1	16.63	14.8	modern	1	Borneo
ZSM02_1	ZSM02	1	22.17	14.7	modern	1	Borneo
ZSM02_1	ZSM02	1	27.71	14.29	modern	1	Borneo
ZSM02_1	ZSM02	1	33.25	14.4	modern	1	Borneo
ZSM02_1	ZSM02	1	38.79	15.15	modern	1	Borneo
ZSM02_1	ZSM02	1	44.33	15.6	modern	1	Borneo
ZSM02_1	ZSM02	1	49.88	15.8	modern	1	Borneo
ZSM02_1	ZSM02	1	55.42	16.27	modern	1	Borneo
ZSM02_1	ZSM02	1	60.96	15.95	modern	1	Borneo
ZSM02_1	ZSM02	1	66.5	14.48	modern	1	Borneo
ZSM02_1	ZSM02	1	72.04	15.01	modern	1	Borneo
ZSM02_1	ZSM02	1	77.58	15.17	modern	1	Borneo
ZSM02_1	ZSM02	1	83.13	15.91	modern	1	Borneo
ZSM02_1	ZSM02	1	88.67	15.95	modern	1	Borneo
ZSM02_1	ZSM02	1	94.21	15.39	modern	1	Borneo
ZSM02_1	ZSM02	1	99.75	15.34	modern	1	Borneo
ZSM02_1	ZSM02	1	105.29	15.15	modern	1	Borneo
ZSM02_1	ZSM02	1	110.83	14.33	modern	1	Borneo
ZSM02_1	ZSM02	1	116.38	14.23	modern	1	Borneo
ZSM02_1	ZSM02	1	121.92	14.63	modern	1	Borneo
ZSM02_1	ZSM02	1	127.46	13.91	modern	1	Borneo
ZSM02_1	ZSM02	1	133	14.47	modern	1	Borneo
ZSM02_1	ZSM02	1	139.22	15.08	modern	1	Borneo
ZSM02_1	ZSM02	1	145.43	14.94	modern	1	Borneo
ZSM02_1	ZSM02	1	151.65	14.81	modern	1	Borneo
ZSM02_1	ZSM02	1	157.87	14.45	modern	1	Borneo
ZSM02_1	ZSM02	1	164.09	14.79	modern	1	Borneo
ZSM02_1	ZSM02	1	170.3	14.33	modern	1	Borneo
ZSM02_1	ZSM02	1	176.52	14.28	modern	1	Borneo
ZSM02_1	ZSM02	1	182.74	14.41	modern	1	Borneo
ZSM02_1	ZSM02	1	188.96	14.69	modern	1	Borneo
ZSM02_1	ZSM02	1	195.17	15.3	modern	1	Borneo
ZSM02_1	ZSM02	1	201.39	15.6	modern	1	Borneo
ZSM02_1	ZSM02	1	207.61	15.63	modern	1	Borneo
ZSM02_1	ZSM02	1	213.83	16.01	modern	1	Borneo
ZSM02_1	ZSM02	1	220.04	16.54	modern	1	Borneo
ZSM02_1	ZSM02	1	226.26	15.29	modern	1	Borneo
ZSM02_1	ZSM02	1	232.48	15.48	modern	1	Borneo
ZSM02_1	ZSM02	1	238.7	15.91	modern	1	Borneo
ZSM02_1	ZSM02	1	244.91	16.14	modern	1	Borneo
ZSM02_1	ZSM02	1	251.13	15.79	modern	1	Borneo
ZSM02_1	ZSM02	1	257.35	16.41	modern	1	Borneo
ZSM02_1	ZSM02	1	263.57	15.74	modern	1	Borneo
ZSM02_1	ZSM02	1	269.78	16.71	modern	1	Borneo
ZSM02_1	ZSM02	1	276	17.35	modern	1	Borneo
ZSM02_1	ZSM02	1	279.31	15.43	modern	1	Borneo
ZSM02_1	ZSM02	1	282.63	16.61	modern	1	Borneo
ZSM02_1	ZSM02	1	285.94	16.5	modern	1	Borneo
ZSM02_1	ZSM02	1	289.25	16.7	modern	1	Borneo
ZSM02_1	ZSM02	1	292.56	15.55	modern	1	Borneo
ZSM02_1	ZSM02	1	295.88	16.29	modern	1	Borneo
ZSM02_1	ZSM02	1	299.19	16.98	modern	1	Borneo
ZSM02_1	ZSM02	1	302.5	14.91	modern	1	Borneo
ZSM02_1	ZSM02	1	305.81	13.75	modern	1	Borneo
ZSM02_1	ZSM02	1	309.13	15.98	modern	1	Borneo
ZSM02_1	ZSM02	1	312.44	15.46	modern	1	Borneo
ZSM02_1	ZSM02	1	315.75	15.08	modern	1	Borneo
ZSM02_1	ZSM02	1	319.06	15.12	modern	1	Borneo
ZSM02_1	ZSM02	1	322.38	15.66	modern	1	Borneo
ZSM02_1	ZSM02	1	325.69	14.38	modern	1	Borneo
ZSM02_1	ZSM02	1	329	15.55	modern	1	Borneo
ZSM02_1	ZSM02	1	340.83	16.28	modern	1	Borneo
ZSM02_1	ZSM02	1	352.67	16.35	modern	1	Borneo
ZSM02_1	ZSM02	1	364.5	16.09	modern	1	Borneo
ZSM02_1	ZSM02	1	376.33	15.7	modern	2	Borneo
ZSM02_1	ZSM02	1	388.17	16.11	modern	2	Borneo
ZSM02_1	ZSM02	1	400	16.19	modern	2	Borneo
ZSM02_1	ZSM02	1	410	16.72	modern	2	Borneo
ZSM02_1	ZSM02	1	420	17.06	modern	2	Borneo
ZSM02_1	ZSM02	1	430	17.61	modern	2	Borneo
ZSM02_1	ZSM02	1	440	16.8	modern	2	Borneo
ZSM02_1	ZSM02	1	450	17.32	modern	2	Borneo
ZSM02_1	ZSM02	1	460	17.21	modern	2	Borneo
ZSM02_1	ZSM02	1	470	17.88	modern	2	Borneo
ZSM02_1	ZSM02	1	480	16.02	modern	2	Borneo
ZSM02_1	ZSM02	1	490	16.02	modern	2	Borneo
ZSM02_1	ZSM02	1	500	15.42	modern	2	Borneo
ZSM02_1	ZSM02	1	510	15.73	modern	2	Borneo
ZSM02_1	ZSM02	1	520	16.94	modern	2	Borneo
ZSM02_1	ZSM02	1	530	16.04	modern	2	Borneo
ZSM02_1	ZSM02	1	540	16.06	modern	2	Borneo
ZSM02_1	ZSM02	1	550	15.9	modern	2	Borneo
ZSM02_1	ZSM02	1	560	15.9	modern	2	Borneo
ZSM02_1	ZSM02	1	570	15.74	modern	2	Borneo
ZSM02_1	ZSM02	1	580	16.46	modern	2	Borneo
ZSM02_1	ZSM02	1	590	16.59	modern	2	Borneo
ZSM02_1	ZSM02	1	596.64	15.37	modern	2	Borneo
ZSM02_1	ZSM02	1	603.29	16.37	modern	2	Borneo
ZSM02_1	ZSM02	1	609.93	16.48	modern	2	Borneo
ZSM02_1	ZSM02	1	616.57	16.83	modern	2	Borneo
ZSM02_1	ZSM02	1	623.21	16.72	modern	2	Borneo
ZSM02_1	ZSM02	1	629.86	17.16	modern	2	Borneo
ZSM02_1	ZSM02	1	636.5	15.82	modern	2	Borneo
ZSM02_1	ZSM02	1	643.14	16.21	modern	2	Borneo
ZSM02_1	ZSM02	1	649.79	16.36	modern	2	Borneo
ZSM02_1	ZSM02	1	656.43	15.97	modern	2	Borneo
ZSM02_1	ZSM02	1	663.07	16.15	modern	2	Borneo
ZSM02_1	ZSM02	1	669.71	16.46	modern	2	Borneo
ZSM02_1	ZSM02	1	676.36	16.78	modern	2	Borneo
ZSM02_1	ZSM02	1	683	16.82	modern	2	Borneo
ZSM02_1	ZSM02	1	689.64	16.7	modern	2	Borneo
ZSM02_1	ZSM02	1	696.29	16.43	modern	2	Borneo
ZSM02_1	ZSM02	1	702.93	16.62	modern	2	Borneo
ZSM02_1	ZSM02	1	709.57	16.68	modern	2	Borneo
ZSM02_1	ZSM02	1	716.21	16.99	modern	2	Borneo
ZSM02_1	ZSM02	1	722.86	16.36	modern	2	Borneo
ZSM02_1	ZSM02	1	729.5	16.17	modern	2	Borneo
ZSM02_2	ZSM02	2	0	13.49	modern	1	Borneo
ZSM02_2	ZSM02	2	5	12.71	modern	1	Borneo
ZSM02_2	ZSM02	2	10	13.25	modern	1	Borneo
ZSM02_2	ZSM02	2	15	13.57	modern	1	Borneo
ZSM02_2	ZSM02	2	20	13.43	modern	1	Borneo
ZSM02_2	ZSM02	2	25	14.95	modern	1	Borneo
ZSM02_2	ZSM02	2	30	14.45	modern	1	Borneo
ZSM02_2	ZSM02	2	34	15.09	modern	1	Borneo
ZSM02_2	ZSM02	2	39	14.77	modern	1	Borneo
ZSM02_2	ZSM02	2	44	15.14	modern	1	Borneo
ZSM02_2	ZSM02	2	49	15.07	modern	1	Borneo
ZSM02_2	ZSM02	2	54	15.33	modern	1	Borneo
ZSM02_2	ZSM02	2	59	15.19	modern	1	Borneo
ZSM02_2	ZSM02	2	65	15.75	modern	1	Borneo
ZSM02_2	ZSM02	2	70	15.55	modern	1	Borneo
ZSM02_2	ZSM02	2	76	16.32	modern	1	Borneo
ZSM02_2	ZSM02	2	82	16.07	modern	1	Borneo
ZSM02_2	ZSM02	2	87	15.88	modern	1	Borneo
ZSM02_2	ZSM02	2	93	16.02	modern	1	Borneo
ZSM02_2	ZSM02	2	98	16.17	modern	1	Borneo
ZSM02_2	ZSM02	2	104	16.09	modern	1	Borneo
ZSM02_2	ZSM02	2	110	16	modern	1	Borneo
ZSM02_2	ZSM02	2	115	15.75	modern	1	Borneo
ZSM02_2	ZSM02	2	121	15.34	modern	1	Borneo
ZSM02_2	ZSM02	2	127	14.92	modern	1	Borneo
ZSM02_2	ZSM02	2	132	14.45	modern	1	Borneo
ZSM02_2	ZSM02	2	138	15.17	modern	1	Borneo
ZSM02_2	ZSM02	2	143	14.45	modern	1	Borneo
ZSM02_2	ZSM02	2	149	14.49	modern	1	Borneo
ZSM02_2	ZSM02	2	155	14.75	modern	1	Borneo
ZSM02_2	ZSM02	2	160	14.33	modern	1	Borneo
ZSM02_2	ZSM02	2	166	13.48	modern	1	Borneo
ZSM02_2	ZSM02	2	172	13.05	modern	1	Borneo
ZSM02_2	ZSM02	2	177	13.1	modern	1	Borneo
ZSM02_2	ZSM02	2	183	13.92	modern	1	Borneo
ZSM02_2	ZSM02	2	189	13.86	modern	1	Borneo
ZSM02_2	ZSM02	2	194	15.31	modern	1	Borneo
ZSM02_2	ZSM02	2	200	15.94	modern	1	Borneo
ZSM02_2	ZSM02	2	205	15.38	modern	1	Borneo
ZSM02_2	ZSM02	2	211	15.71	modern	1	Borneo
ZSM02_2	ZSM02	2	217	15.93	modern	1	Borneo
ZSM02_2	ZSM02	2	222	15.63	modern	1	Borneo
ZSM02_2	ZSM02	2	228	16.17	modern	1	Borneo
ZSM02_2	ZSM02	2	234	16.46	modern	1	Borneo
ZSM02_2	ZSM02	2	239	16.64	modern	1	Borneo
ZSM02_2	ZSM02	2	245	16.64	modern	1	Borneo
ZSM02_2	ZSM02	2	250	15.13	modern	1	Borneo
ZSM02_2	ZSM02	2	256	15.57	modern	1	Borneo
ZSM02_2	ZSM02	2	262	15.76	modern	1	Borneo
ZSM02_2	ZSM02	2	267	15.28	modern	1	Borneo
ZSM02_2	ZSM02	2	273	14.95	modern	1	Borneo
ZSM02_2	ZSM02	2	280	15.29	modern	1	Borneo
ZSM02_2	ZSM02	2	286	15.35	modern	1	Borneo
ZSM02_2	ZSM02	2	293	15.09	modern	1	Borneo
ZSM02_2	ZSM02	2	300	14.96	modern	1	Borneo
ZSM02_2	ZSM02	2	306	13.96	modern	1	Borneo
ZSM02_2	ZSM02	2	313	15.32	modern	1	Borneo
ZSM02_2	ZSM02	2	320	15.62	modern	1	Borneo
ZSM02_2	ZSM02	2	326	15.78	modern	1	Borneo
ZSM02_2	ZSM02	2	333	15.95	modern	1	Borneo
ZSM02_2	ZSM02	2	340	16	modern	1	Borneo
ZSM02_2	ZSM02	2	346	16.18	modern	1	Borneo
ZSM02_2	ZSM02	2	353	16.76	modern	1	Borneo
ZSM02_2	ZSM02	2	360	16.17	modern	1	Borneo
ZSM02_2	ZSM02	2	367	16.38	modern	2	Borneo
ZSM02_2	ZSM02	2	373	15.83	modern	2	Borneo
ZSM02_2	ZSM02	2	380	16.91	modern	2	Borneo
ZSM02_2	ZSM02	2	387	17.03	modern	2	Borneo
ZSM02_2	ZSM02	2	393	17.04	modern	2	Borneo
ZSM02_2	ZSM02	2	400	17.31	modern	2	Borneo
ZSM02_2	ZSM02	2	407	17.64	modern	2	Borneo
ZSM02_2	ZSM02	2	413	17.39	modern	2	Borneo
ZSM02_2	ZSM02	2	420	16.89	modern	2	Borneo
ZSM02_2	ZSM02	2	427	16.55	modern	2	Borneo
ZSM02_2	ZSM02	2	433	16.54	modern	2	Borneo
ZSM02_2	ZSM02	2	440	15.81	modern	2	Borneo
ZSM02_2	ZSM02	2	447	15.45	modern	2	Borneo
ZSM02_2	ZSM02	2	453	15.48	modern	2	Borneo
ZSM02_2	ZSM02	2	460	15.24	modern	2	Borneo
ZSM02_2	ZSM02	2	467	15.11	modern	2	Borneo
ZSM02_2	ZSM02	2	474	14.69	modern	2	Borneo
ZSM02_2	ZSM02	2	480	14.85	modern	2	Borneo
ZSM02_2	ZSM02	2	487	15.04	modern	2	Borneo
ZSM02_2	ZSM02	2	494	15.05	modern	2	Borneo
ZSM02_2	ZSM02	2	500	14.91	modern	2	Borneo
ZSM02_2	ZSM02	2	507	15.01	modern	2	Borneo
ZSM02_2	ZSM02	2	515	15.15	modern	2	Borneo
ZSM02_2	ZSM02	2	523	15.38	modern	2	Borneo
ZSM02_2	ZSM02	2	531	14.96	modern	2	Borneo
ZSM02_2	ZSM02	2	540	15.08	modern	2	Borneo
ZSM02_2	ZSM02	2	548	14.23	modern	2	Borneo
ZSM02_2	ZSM02	2	556	13.8	modern	2	Borneo
ZSM02_2	ZSM02	2	564	14.62	modern	2	Borneo
ZSM02_2	ZSM02	2	572	14.7	modern	2	Borneo
ZSM02_2	ZSM02	2	580	13.74	modern	2	Borneo
ZSM02_2	ZSM02	2	589	14	modern	2	Borneo
ZSM02_2	ZSM02	2	597	15.07	modern	2	Borneo
ZSM02_2	ZSM02	2	605	15.27	modern	2	Borneo
ZSM02_2	ZSM02	2	613	15.49	modern	2	Borneo
ZSM02_2	ZSM02	2	621	15.15	modern	2	Borneo
ZSM02_2	ZSM02	2	629	15.14	modern	2	Borneo
ZSM02_2	ZSM02	2	638	14.57	modern	2	Borneo
ZSM02_2	ZSM02	2	646	14.25	modern	2	Borneo
ZSM02_2	ZSM02	2	654	14.65	modern	2	Borneo
ZSM02_2	ZSM02	2	662	14.72	modern	2	Borneo
ZSM02_2	ZSM02	2	668	14.47	modern	2	Borneo
ZSM02_2	ZSM02	2	675	14.7	modern	2	Borneo
ZSM02_2	ZSM02	2	681	14.61	modern	2	Borneo
ZSM02_2	ZSM02	2	687	14.69	modern	2	Borneo
ZSM02_2	ZSM02	2	693	15.06	modern	2	Borneo
ZSM02_2	ZSM02	2	700	14.42	modern	2	Borneo
ZSM02_2	ZSM02	2	706	14.98	modern	2	Borneo
ZSM02_2	ZSM02	2	712	14.72	modern	2	Borneo
ZSM02_2	ZSM02	2	718	14.87	modern	2	Borneo
ZSM02_2	ZSM02	2	725	14.98	modern	2	Borneo
ZSM02_2	ZSM02	2	731	15.49	modern	3	Borneo
ZSM02_2	ZSM02	2	737	15.47	modern	3	Borneo
ZSM02_2	ZSM02	2	742	15.17	modern	3	Borneo
ZSM02_2	ZSM02	2	748	15.43	modern	3	Borneo
ZSM02_2	ZSM02	2	753	15.57	modern	3	Borneo
ZSM02_2	ZSM02	2	758	15.14	modern	3	Borneo
ZSM02_2	ZSM02	2	764	15.7	modern	3	Borneo
ZSM02_2	ZSM02	2	769	15.87	modern	3	Borneo
ZSM02_2	ZSM02	2	774	16.08	modern	3	Borneo
ZSM02_2	ZSM02	2	780	15.83	modern	3	Borneo
ZSM02_2	ZSM02	2	785	15.97	modern	3	Borneo
ZSM02_2	ZSM02	2	790	15.68	modern	3	Borneo
ZSM02_2	ZSM02	2	796	15.52	modern	3	Borneo
ZSM02_2	ZSM02	2	801	14.83	modern	3	Borneo
ZSM02_2	ZSM02	2	806	14.37	modern	3	Borneo
ZSM02_2	ZSM02	2	812	14.6	modern	3	Borneo
ZSM02_2	ZSM02	2	817	14.82	modern	3	Borneo
ZSM02_2	ZSM02	2	823	14.27	modern	3	Borneo
ZSM02_2	ZSM02	2	829	13.79	modern	3	Borneo
ZSM02_2	ZSM02	2	835	13.92	modern	3	Borneo
ZSM02_2	ZSM02	2	841	15.36	modern	3	Borneo
ZSM02_2	ZSM02	2	847	16.28	modern	3	Borneo
ZSM02_2	ZSM02	2	852	16.33	modern	3	Borneo
ZSM02_2	ZSM02	2	858	16.21	modern	3	Borneo
ZSM02_2	ZSM02	2	864	15.87	modern	3	Borneo
ZSM02_2	ZSM02	2	870	15.78	modern	3	Borneo
ZSM02_2	ZSM02	2	876	16.06	modern	3	Borneo
ZSM02_2	ZSM02	2	882	15.83	modern	3	Borneo
ZSM02_2	ZSM02	2	888	16	modern	3	Borneo
ZSM02_2	ZSM02	2	894	16.11	modern	3	Borneo
ZSM02_2	ZSM02	2	900	16.06	modern	3	Borneo
ZSM02_2	ZSM02	2	906	16.58	modern	3	Borneo
ZSM02_2	ZSM02	2	912	15.64	modern	3	Borneo
ZSM02_2	ZSM02	2	917	15.96	modern	3	Borneo
ZSM02_2	ZSM02	2	923	16.39	modern	3	Borneo
ZSM02_2	ZSM02	2	929	17.13	modern	3	Borneo
ZSM02_2	ZSM02	2	935	17.51	modern	3	Borneo
ZSM02_2	ZSM02	2	941	17.44	modern	3	Borneo
ZSM02_2	ZSM02	2	947	17.1	modern	3	Borneo
ZSM02_2	ZSM02	2	953	17.24	modern	3	Borneo
ZSM02_2	ZSM02	2	959	17.26	modern	3	Borneo
ZSM02_2	ZSM02	2	965	16.96	modern	3	Borneo
ZSM02_2	ZSM02	2	971	17.51	modern	3	Borneo
ZSM02_2	ZSM02	2	976	17.08	modern	3	Borneo
ZSM02_2	ZSM02	2	982	17.13	modern	3	Borneo
ZSM02_2	ZSM02	2	988	16.79	modern	3	Borneo
ZSM02_2	ZSM02	2	994	16.9	modern	3	Borneo
ZSM02_2	ZSM02	2	1000	16.64	modern	3	Borneo
ZSM02_2	ZSM02	2	1006	17.49	modern	3	Borneo
ZSM02_2	ZSM02	2	1012	18.08	modern	3	Borneo
ZSM02_2	ZSM02	2	1018	17.35	modern	3	Borneo
ZSM02_2	ZSM02	2	1024	17.34	modern	3	Borneo
ZSM02_2	ZSM02	2	1030	16.73	modern	3	Borneo
ZSM02_2	ZSM02	2	1036	16.91	modern	3	Borneo
ZSM02_2	ZSM02	2	1041	16.78	modern	3	Borneo
ZSM02_2	ZSM02	2	1047	16.75	modern	3	Borneo
ZSM02_2	ZSM02	2	1053	16.63	modern	3	Borneo
ZSM02_2	ZSM02	2	1059	17.37	modern	3	Borneo
ZSM02_2	ZSM02	2	1065	17.4	modern	3	Borneo
ZSM02_2	ZSM02	2	1071	17.95	modern	3	Borneo
ZSM02_2	ZSM02	2	1077	18.2	modern	3	Borneo
ZSM02_2	ZSM02	2	1083	17.89	modern	3	Borneo
ZSM02_2	ZSM02	2	1089	17.92	modern	3	Borneo
ZSM02_2	ZSM02	2	1095	17.69	modern	3	Borneo
ZSM02_3	ZSM02	3	0	16.44	modern	1	Borneo
ZSM02_3	ZSM02	3	6	16.14	modern	1	Borneo
ZSM02_3	ZSM02	3	11	16.24	modern	1	Borneo
ZSM02_3	ZSM02	3	17	15.38	modern	1	Borneo
ZSM02_3	ZSM02	3	22	15.82	modern	1	Borneo
ZSM02_3	ZSM02	3	28	15.1	modern	1	Borneo
ZSM02_3	ZSM02	3	33	15.34	modern	1	Borneo
ZSM02_3	ZSM02	3	39	15.16	modern	1	Borneo
ZSM02_3	ZSM02	3	44	14.29	modern	1	Borneo
ZSM02_3	ZSM02	3	50	15.81	modern	1	Borneo
ZSM02_3	ZSM02	3	55	16.33	modern	1	Borneo
ZSM02_3	ZSM02	3	61	16.91	modern	1	Borneo
ZSM02_3	ZSM02	3	66	16.57	modern	1	Borneo
ZSM02_3	ZSM02	3	72	17.08	modern	1	Borneo
ZSM02_3	ZSM02	3	77	17.02	modern	1	Borneo
ZSM02_3	ZSM02	3	83	16.83	modern	1	Borneo
ZSM02_3	ZSM02	3	88	17.43	modern	1	Borneo
ZSM02_3	ZSM02	3	92	17.72	modern	1	Borneo
ZSM02_3	ZSM02	3	96	17.33	modern	1	Borneo
ZSM02_3	ZSM02	3	100	17.5	modern	1	Borneo
ZSM02_3	ZSM02	3	104	17.91	modern	1	Borneo
ZSM02_3	ZSM02	3	108	17.64	modern	1	Borneo
ZSM02_3	ZSM02	3	113	16.88	modern	1	Borneo
ZSM02_3	ZSM02	3	117	16.83	modern	1	Borneo
ZSM02_3	ZSM02	3	121	16.93	modern	1	Borneo
ZSM02_3	ZSM02	3	125	17.01	modern	1	Borneo
ZSM02_3	ZSM02	3	129	17.58	modern	1	Borneo
ZSM02_3	ZSM02	3	133	17.1	modern	1	Borneo
ZSM02_3	ZSM02	3	138	16.97	modern	1	Borneo
ZSM02_3	ZSM02	3	143	17.27	modern	1	Borneo
ZSM02_3	ZSM02	3	148	16.51	modern	1	Borneo
ZSM02_3	ZSM02	3	153	17.42	modern	1	Borneo
ZSM02_3	ZSM02	3	159	17.27	modern	1	Borneo
ZSM02_3	ZSM02	3	164	16.84	modern	1	Borneo
ZSM02_3	ZSM02	3	169	16.67	modern	1	Borneo
ZSM02_3	ZSM02	3	174	16.49	modern	1	Borneo
ZSM02_3	ZSM02	3	179	16.42	modern	1	Borneo
ZSM02_3	ZSM02	3	184	16.75	modern	1	Borneo
ZSM02_3	ZSM02	3	189	16.56	modern	1	Borneo
ZSM02_3	ZSM02	3	193	16.46	modern	1	Borneo
ZSM02_3	ZSM02	3	198	16.6	modern	1	Borneo
ZSM02_3	ZSM02	3	202	15.58	modern	1	Borneo
ZSM02_3	ZSM02	3	207	16.8	modern	1	Borneo
ZSM02_3	ZSM02	3	212	16.72	modern	1	Borneo
ZSM02_3	ZSM02	3	216	16.54	modern	1	Borneo
ZSM02_3	ZSM02	3	221	15.65	modern	1	Borneo
ZSM02_3	ZSM02	3	225	16.21	modern	1	Borneo
ZSM02_3	ZSM02	3	230	16.45	modern	1	Borneo
ZSM02_3	ZSM02	3	235	16.18	modern	1	Borneo
ZSM02_3	ZSM02	3	239	15.88	modern	1	Borneo
ZSM02_3	ZSM02	3	244	15.87	modern	1	Borneo
ZSM02_3	ZSM02	3	248	15.49	modern	1	Borneo
ZSM02_3	ZSM02	3	253	15.23	modern	1	Borneo
ZSM02_3	ZSM02	3	258	15.71	modern	1	Borneo
ZSM02_3	ZSM02	3	262	15.63	modern	1	Borneo
ZSM02_3	ZSM02	3	267	15.97	modern	1	Borneo
ZSM02_3	ZSM02	3	271	15.94	modern	1	Borneo
ZSM02_3	ZSM02	3	276	16.41	modern	1	Borneo
ZSM02_3	ZSM02	3	281	16.82	modern	1	Borneo
ZSM02_3	ZSM02	3	285	16.77	modern	1	Borneo
ZSM02_3	ZSM02	3	290	16.48	modern	1	Borneo
ZSM02_3	ZSM02	3	294	16.63	modern	1	Borneo
ZSM02_3	ZSM02	3	299	16.43	modern	1	Borneo
ZSM02_3	ZSM02	3	304	15.87	modern	1	Borneo
ZSM02_3	ZSM02	3	309	16.38	modern	1	Borneo
ZSM02_3	ZSM02	3	315	15.12	modern	1	Borneo
ZSM02_3	ZSM02	3	320	16.21	modern	1	Borneo
ZSM02_3	ZSM02	3	325	16.05	modern	1	Borneo
ZSM02_3	ZSM02	3	330	16.34	modern	1	Borneo
ZSM02_3	ZSM02	3	335	16.66	modern	1	Borneo
ZSM02_3	ZSM02	3	341	17.23	modern	1	Borneo
ZSM02_3	ZSM02	3	346	17.1	modern	1	Borneo
ZSM02_3	ZSM02	3	351	17.48	modern	1	Borneo
ZSM02_3	ZSM02	3	356	17.43	modern	1	Borneo
ZSM02_3	ZSM02	3	361	17.51	modern	1	Borneo
ZSM02_3	ZSM02	3	367	17.23	modern	2	Borneo
ZSM02_3	ZSM02	3	372	16.84	modern	2	Borneo
ZSM02_3	ZSM02	3	377	15.97	modern	2	Borneo
ZSM02_3	ZSM02	3	382	16.26	modern	2	Borneo
ZSM02_3	ZSM02	3	387	16.24	modern	2	Borneo
ZSM02_3	ZSM02	3	393	16.22	modern	2	Borneo
ZSM02_3	ZSM02	3	398	16.83	modern	2	Borneo
ZSM02_3	ZSM02	3	403	16.64	modern	2	Borneo
ZSM02_3	ZSM02	3	408	16.93	modern	2	Borneo
ZSM02_3	ZSM02	3	413	16.82	modern	2	Borneo
ZSM02_3	ZSM02	3	419	16.5	modern	2	Borneo
ZSM02_3	ZSM02	3	424	16.24	modern	2	Borneo
ZSM02_3	ZSM02	3	429	15.81	modern	2	Borneo
ZSM02_3	ZSM02	3	434	15.72	modern	2	Borneo
ZSM02_3	ZSM02	3	439	15.6	modern	2	Borneo
ZSM02_3	ZSM02	3	445	16	modern	2	Borneo
ZSM02_3	ZSM02	3	450	15.93	modern	2	Borneo
ZSM02_3	ZSM02	3	455	15.45	modern	2	Borneo
ZSM02_3	ZSM02	3	460	15.92	modern	2	Borneo
ZSM02_3	ZSM02	3	465	15.52	modern	2	Borneo
ZSM02_3	ZSM02	3	471	15.87	modern	2	Borneo
ZSM02_3	ZSM02	3	476	16.02	modern	2	Borneo
ZSM02_3	ZSM02	3	481	16.29	modern	2	Borneo
ZSM02_3	ZSM02	3	491	16.01	modern	2	Borneo
ZSM02_3	ZSM02	3	501	15.61	modern	2	Borneo
ZSM02_3	ZSM02	3	511	15.89	modern	2	Borneo
ZSM02_3	ZSM02	3	521	15.51	modern	2	Borneo
ZSM02_3	ZSM02	3	531	15.67	modern	2	Borneo
ZSM02_3	ZSM02	3	541	15.97	modern	2	Borneo
ZSM02_3	ZSM02	3	551	16.36	modern	2	Borneo
ZSM02_3	ZSM02	3	561	15.75	modern	2	Borneo
ZSM02_3	ZSM02	3	571	15.95	modern	2	Borneo
ZSM02_3	ZSM02	3	581	16.52	modern	2	Borneo
ZSM02_3	ZSM02	3	591	16.37	modern	2	Borneo
ZSM02_3	ZSM02	3	601	16.7	modern	2	Borneo
ZSM02_3	ZSM02	3	611	16.75	modern	2	Borneo
ZSM02_3	ZSM02	3	621	16.86	modern	2	Borneo
ZSM02_3	ZSM02	3	631	16.59	modern	2	Borneo
ZSM02_3	ZSM02	3	639	16.79	modern	2	Borneo
ZSM02_3	ZSM02	3	647	16.66	modern	2	Borneo
ZSM02_3	ZSM02	3	655	16.89	modern	2	Borneo
ZSM02_3	ZSM02	3	663	17.55	modern	2	Borneo
ZSM02_3	ZSM02	3	671	17.85	modern	2	Borneo
ZSM02_3	ZSM02	3	679	17.95	modern	2	Borneo
ZSM02_3	ZSM02	3	687	17.46	modern	2	Borneo
ZSM02_3	ZSM02	3	695	17.1	modern	2	Borneo
ZSM02_3	ZSM02	3	703	16.8	modern	2	Borneo
ZSM02_3	ZSM02	3	711	16.64	modern	2	Borneo
ZSM02_3	ZSM02	3	717	16.11	modern	2	Borneo
ZSM02_3	ZSM02	3	724	16.09	modern	2	Borneo
ZSM02_3	ZSM02	3	730	15.43	modern	2	Borneo
ZSM02_3	ZSM02	3	736	15.32	modern	3	Borneo
ZSM02_3	ZSM02	3	743	15.29	modern	3	Borneo
ZSM02_3	ZSM02	3	749	15.6	modern	3	Borneo
ZSM02_3	ZSM02	3	755	16	modern	3	Borneo
ZSM02_3	ZSM02	3	761	15.99	modern	3	Borneo
ZSM02_3	ZSM02	3	768	15.72	modern	3	Borneo
ZSM02_3	ZSM02	3	774	16.12	modern	3	Borneo
ZSM02_3	ZSM02	3	780	16.48	modern	3	Borneo
ZSM02_3	ZSM02	3	787	16.85	modern	3	Borneo
ZSM02_3	ZSM02	3	793	17.49	modern	3	Borneo
ZSM02_3	ZSM02	3	799	17.28	modern	3	Borneo
ZSM02_3	ZSM02	3	806	17.19	modern	3	Borneo
ZSM02_3	ZSM02	3	812	17.59	modern	3	Borneo
ZSM02_3	ZSM02	3	818	17.34	modern	3	Borneo
ZSM02_3	ZSM02	3	824	16.96	modern	3	Borneo
ZSM02_3	ZSM02	3	831	16.76	modern	3	Borneo
ZSM02_3	ZSM02	3	837	16.72	modern	3	Borneo
ZSM02_3	ZSM02	3	843	17.59	modern	3	Borneo
ZSM02_3	ZSM02	3	850	17.95	modern	3	Borneo
ZSM02_3	ZSM02	3	856	17.91	modern	3	Borneo
ZSM02_3	ZSM02	3	862	17.3	modern	3	Borneo
ZSM02_3	ZSM02	3	869	17.29	modern	3	Borneo
ZSM02_3	ZSM02	3	875	17.79	modern	3	Borneo
ZSM02_3	ZSM02	3	881	18.09	modern	3	Borneo
ZSM02_3	ZSM02	3	888	18.03	modern	3	Borneo
ZSM02_3	ZSM02	3	894	17.79	modern	3	Borneo
ZSM02_3	ZSM02	3	900	17.58	modern	3	Borneo
ZSM02_3	ZSM02	3	906	18.22	modern	3	Borneo
ZSM02_3	ZSM02	3	913	18.23	modern	3	Borneo
ZSM02_3	ZSM02	3	919	18.97	modern	3	Borneo
ZSM02_3	ZSM02	3	925	18.62	modern	3	Borneo
ZSM02_3	ZSM02	3	932	18.28	modern	3	Borneo
ZSM02_3	ZSM02	3	938	18.22	modern	3	Borneo
ZSM02_3	ZSM02	3	944	18.07	modern	3	Borneo
ZSM02_3	ZSM02	3	951	17.7	modern	3	Borneo
ZSM02_3	ZSM02	3	957	17.57	modern	3	Borneo
ZSM02_3	ZSM02	3	963	17.28	modern	3	Borneo
ZSM02_3	ZSM02	3	969	17.35	modern	3	Borneo
ZSM02_3	ZSM02	3	976	17.15	modern	3	Borneo
ZSM02_3	ZSM02	3	982	16.81	modern	3	Borneo
ZSM02_3	ZSM02	3	988	16.66	modern	3	Borneo
ZSM02_3	ZSM02	3	995	15.86	modern	3	Borneo
ZSM02_3	ZSM02	3	1001	15.32	modern	3	Borneo
ZSM02_3	ZSM02	3	1008	15.15	modern	3	Borneo
ZSM02_3	ZSM02	3	1015	14.94	modern	3	Borneo
ZSM02_3	ZSM02	3	1022	15.34	modern	3	Borneo
ZSM02_3	ZSM02	3	1028	16.11	modern	3	Borneo
ZSM02_3	ZSM02	3	1035	17.01	modern	3	Borneo
ZSM02_3	ZSM02	3	1042	17.24	modern	3	Borneo
ZSM02_3	ZSM02	3	1049	17.87	modern	3	Borneo
ZSM02_3	ZSM02	3	1056	17.71	modern	3	Borneo
ZSM02_3	ZSM02	3	1063	17.01	modern	3	Borneo
ZSM02_3	ZSM02	3	1069	18.36	modern	3	Borneo
ZSM02_3	ZSM02	3	1076	18.34	modern	3	Borneo
ZSM02_3	ZSM02	3	1083	17.37	modern	3	Borneo
ZSM02_3	ZSM02	3	1090	18.09	modern	3	Borneo
ZSM03_1	ZSM03	1	0	17.71	modern	1	Sumatra
ZSM03_1	ZSM03	1	9.42	16.33	modern	1	Sumatra
ZSM03_1	ZSM03	1	18.83	15.9	modern	1	Sumatra
ZSM03_1	ZSM03	1	28.25	15.66	modern	1	Sumatra
ZSM03_1	ZSM03	1	37.67	16.04	modern	1	Sumatra
ZSM03_1	ZSM03	1	47.08	15.32	modern	1	Sumatra
ZSM03_1	ZSM03	1	56.5	15.91	modern	1	Sumatra
ZSM03_1	ZSM03	1	65.92	16.45	modern	1	Sumatra
ZSM03_1	ZSM03	1	75.33	16.78	modern	1	Sumatra
ZSM03_1	ZSM03	1	84.75	16.71	modern	1	Sumatra
ZSM03_1	ZSM03	1	94.17	17.88	modern	1	Sumatra
ZSM03_1	ZSM03	1	103.58	18.31	modern	1	Sumatra
ZSM03_1	ZSM03	1	113	16.69	modern	1	Sumatra
ZSM03_1	ZSM03	1	143.11	15.58	modern	1	Sumatra
ZSM03_1	ZSM03	1	173.22	15.91	modern	1	Sumatra
ZSM03_1	ZSM03	1	203.33	15.04	modern	1	Sumatra
ZSM03_1	ZSM03	1	233.44	15.89	modern	1	Sumatra
ZSM03_1	ZSM03	1	263.56	16.8	modern	1	Sumatra
ZSM03_1	ZSM03	1	293.67	17.89	modern	1	Sumatra
ZSM03_1	ZSM03	1	323.78	17.72	modern	1	Sumatra
ZSM03_1	ZSM03	1	353.89	15.55	modern	1	Sumatra
ZSM03_1	ZSM03	1	384	17.72	modern	2	Sumatra
ZSM03_1	ZSM03	1	400.36	16.53	modern	2	Sumatra
ZSM03_1	ZSM03	1	416.73	15.6	modern	2	Sumatra
ZSM03_1	ZSM03	1	433.09	15.07	modern	2	Sumatra
ZSM03_1	ZSM03	1	449.45	12.37	modern	2	Sumatra
ZSM03_1	ZSM03	1	465.82	12.31	modern	2	Sumatra
ZSM03_1	ZSM03	1	482.18	12.75	modern	2	Sumatra
ZSM03_1	ZSM03	1	498.55	14.43	modern	2	Sumatra
ZSM03_1	ZSM03	1	514.91	13.07	modern	2	Sumatra
ZSM03_1	ZSM03	1	531.27	14.46	modern	2	Sumatra
ZSM03_1	ZSM03	1	547.64	14.37	modern	2	Sumatra
ZSM03_1	ZSM03	1	564	15.46	modern	2	Sumatra
ZSM03_1	ZSM03	1	580.36	16.18	modern	2	Sumatra
ZSM03_1	ZSM03	1	596.73	17.66	modern	2	Sumatra
ZSM03_1	ZSM03	1	613.09	16.18	modern	2	Sumatra
ZSM03_1	ZSM03	1	629.45	16.2	modern	2	Sumatra
ZSM03_1	ZSM03	1	645.82	15.51	modern	2	Sumatra
ZSM03_1	ZSM03	1	662.18	15.44	modern	2	Sumatra
ZSM03_1	ZSM03	1	678.55	14.48	modern	2	Sumatra
ZSM03_1	ZSM03	1	694.91	14.95	modern	2	Sumatra
ZSM03_1	ZSM03	1	711.27	14.2	modern	2	Sumatra
ZSM03_1	ZSM03	1	727.64	14.79	modern	2	Sumatra
ZSM03_1	ZSM03	1	744	14.75	modern	3	Sumatra
ZSM03_1	ZSM03	1	752.54	15.09	modern	3	Sumatra
ZSM03_1	ZSM03	1	761.07	14.93	modern	3	Sumatra
ZSM03_1	ZSM03	1	769.61	16.65	modern	3	Sumatra
ZSM03_1	ZSM03	1	778.14	17.2	modern	3	Sumatra
ZSM03_1	ZSM03	1	786.68	16.77	modern	3	Sumatra
ZSM03_1	ZSM03	1	795.21	16.47	modern	3	Sumatra
ZSM03_1	ZSM03	1	803.75	16.92	modern	3	Sumatra
ZSM03_1	ZSM03	1	812.29	16.55	modern	3	Sumatra
ZSM03_1	ZSM03	1	820.82	16.16	modern	3	Sumatra
ZSM03_1	ZSM03	1	829.36	16.83	modern	3	Sumatra
ZSM03_1	ZSM03	1	837.89	15.84	modern	3	Sumatra
ZSM03_1	ZSM03	1	846.43	16.84	modern	3	Sumatra
ZSM03_1	ZSM03	1	854.96	16.14	modern	3	Sumatra
ZSM03_1	ZSM03	1	863.5	16.97	modern	3	Sumatra
ZSM03_1	ZSM03	1	872.04	16.8	modern	3	Sumatra
ZSM03_1	ZSM03	1	880.57	14.07	modern	3	Sumatra
ZSM03_1	ZSM03	1	889.11	16.48	modern	3	Sumatra
ZSM03_1	ZSM03	1	897.64	16.77	modern	3	Sumatra
ZSM03_1	ZSM03	1	906.18	15.19	modern	3	Sumatra
ZSM03_1	ZSM03	1	914.71	15.99	modern	3	Sumatra
ZSM03_1	ZSM03	1	923.25	14.55	modern	3	Sumatra
ZSM03_1	ZSM03	1	931.79	14.4	modern	3	Sumatra
ZSM03_1	ZSM03	1	940.32	13.84	modern	3	Sumatra
ZSM03_1	ZSM03	1	948.86	13.69	modern	3	Sumatra
ZSM03_1	ZSM03	1	957.39	14.02	modern	3	Sumatra
ZSM03_1	ZSM03	1	965.93	13.58	modern	3	Sumatra
ZSM03_1	ZSM03	1	974.46	16.29	modern	3	Sumatra
ZSM03_1	ZSM03	1	983	16.12	modern	3	Sumatra
ZSM03_1	ZSM03	1	990.2	16.24	modern	3	Sumatra
ZSM03_1	ZSM03	1	997.4	16.33	modern	3	Sumatra
ZSM03_1	ZSM03	1	1004.6	16.03	modern	3	Sumatra
ZSM03_1	ZSM03	1	1011.8	16.44	modern	3	Sumatra
ZSM03_1	ZSM03	1	1019	17.55	modern	3	Sumatra
ZSM03_1	ZSM03	1	1026.2	16.59	modern	3	Sumatra
ZSM03_1	ZSM03	1	1033.4	16.45	modern	3	Sumatra
ZSM03_1	ZSM03	1	1040.6	16.15	modern	3	Sumatra
ZSM03_1	ZSM03	1	1047.8	15.64	modern	3	Sumatra
ZSM03_1	ZSM03	1	1055	16.42	modern	3	Sumatra
ZSM03_1	ZSM03	1	1062.2	15.99	modern	3	Sumatra
ZSM03_1	ZSM03	1	1069.4	15.94	modern	3	Sumatra
ZSM03_1	ZSM03	1	1076.6	15.43	modern	3	Sumatra
ZSM03_1	ZSM03	1	1083.8	15.38	modern	3	Sumatra
ZSM03_1	ZSM03	1	1091	15.49	modern	3	Sumatra
ZSM03_2	ZSM03	2	0	14.41	modern	1	Sumatra
ZSM03_2	ZSM03	2	6	15.08	modern	1	Sumatra
ZSM03_2	ZSM03	2	12	15.33	modern	1	Sumatra
ZSM03_2	ZSM03	2	18	15.33	modern	1	Sumatra
ZSM03_2	ZSM03	2	23	15.31	modern	1	Sumatra
ZSM03_2	ZSM03	2	29	15.68	modern	1	Sumatra
ZSM03_2	ZSM03	2	35	14.95	modern	1	Sumatra
ZSM03_2	ZSM03	2	41	15.74	modern	1	Sumatra
ZSM03_2	ZSM03	2	47	16.11	modern	1	Sumatra
ZSM03_2	ZSM03	2	53	16.39	modern	1	Sumatra
ZSM03_2	ZSM03	2	59	16.24	modern	1	Sumatra
ZSM03_2	ZSM03	2	64	15.61	modern	1	Sumatra
ZSM03_2	ZSM03	2	70	15.69	modern	1	Sumatra
ZSM03_2	ZSM03	2	76	16.57	modern	1	Sumatra
ZSM03_2	ZSM03	2	82	16.55	modern	1	Sumatra
ZSM03_2	ZSM03	2	88	15.41	modern	1	Sumatra
ZSM03_2	ZSM03	2	94	14.42	modern	1	Sumatra
ZSM03_2	ZSM03	2	99	14.96	modern	1	Sumatra
ZSM03_2	ZSM03	2	105	15	modern	1	Sumatra
ZSM03_2	ZSM03	2	111	15.38	modern	1	Sumatra
ZSM03_2	ZSM03	2	117	15.1	modern	1	Sumatra
ZSM03_2	ZSM03	2	122	15	modern	1	Sumatra
ZSM03_2	ZSM03	2	128	14.98	modern	1	Sumatra
ZSM03_2	ZSM03	2	133	15.56	modern	1	Sumatra
ZSM03_2	ZSM03	2	138	15.94	modern	1	Sumatra
ZSM03_2	ZSM03	2	143	15.61	modern	1	Sumatra
ZSM03_2	ZSM03	2	149	15.39	modern	1	Sumatra
ZSM03_2	ZSM03	2	154	15.2	modern	1	Sumatra
ZSM03_2	ZSM03	2	159	15.92	modern	1	Sumatra
ZSM03_2	ZSM03	2	165	16.7	modern	1	Sumatra
ZSM03_2	ZSM03	2	170	16.83	modern	1	Sumatra
ZSM03_2	ZSM03	2	175	16.97	modern	1	Sumatra
ZSM03_2	ZSM03	2	181	16.56	modern	1	Sumatra
ZSM03_2	ZSM03	2	186	16.59	modern	1	Sumatra
ZSM03_2	ZSM03	2	191	16.23	modern	1	Sumatra
ZSM03_2	ZSM03	2	196	14.85	modern	1	Sumatra
ZSM03_2	ZSM03	2	202	13.2	modern	1	Sumatra
ZSM03_2	ZSM03	2	207	12.88	modern	1	Sumatra
ZSM03_2	ZSM03	2	215	14.38	modern	1	Sumatra
ZSM03_2	ZSM03	2	223	13.28	modern	1	Sumatra
ZSM03_2	ZSM03	2	232	13.85	modern	1	Sumatra
ZSM03_2	ZSM03	2	240	14.3	modern	1	Sumatra
ZSM03_2	ZSM03	2	248	15.25	modern	1	Sumatra
ZSM03_2	ZSM03	2	256	15.42	modern	1	Sumatra
ZSM03_2	ZSM03	2	264	15.03	modern	1	Sumatra
ZSM03_2	ZSM03	2	272	15.14	modern	1	Sumatra
ZSM03_2	ZSM03	2	281	15.15	modern	1	Sumatra
ZSM03_2	ZSM03	2	289	15.09	modern	1	Sumatra
ZSM03_2	ZSM03	2	297	15.33	modern	1	Sumatra
ZSM03_2	ZSM03	2	305	15.29	modern	1	Sumatra
ZSM03_2	ZSM03	2	313	15.11	modern	1	Sumatra
ZSM03_2	ZSM03	2	321	14.35	modern	1	Sumatra
ZSM03_2	ZSM03	2	330	14.58	modern	1	Sumatra
ZSM03_2	ZSM03	2	338	15.53	modern	1	Sumatra
ZSM03_2	ZSM03	2	346	15.38	modern	1	Sumatra
ZSM03_2	ZSM03	2	354	15.74	modern	1	Sumatra
ZSM03_2	ZSM03	2	362	14.9	modern	1	Sumatra
ZSM03_2	ZSM03	2	370	14.94	modern	2	Sumatra
ZSM03_2	ZSM03	2	379	14.71	modern	2	Sumatra
ZSM03_2	ZSM03	2	387	14.47	modern	2	Sumatra
ZSM03_2	ZSM03	2	395	14.3	modern	2	Sumatra
ZSM03_2	ZSM03	2	403	14.32	modern	2	Sumatra
ZSM03_2	ZSM03	2	411	14.69	modern	2	Sumatra
ZSM03_2	ZSM03	2	419	14.53	modern	2	Sumatra
ZSM03_2	ZSM03	2	428	14.87	modern	2	Sumatra
ZSM03_2	ZSM03	2	436	15.22	modern	2	Sumatra
ZSM03_2	ZSM03	2	444	15.09	modern	2	Sumatra
ZSM03_2	ZSM03	2	452	15.1	modern	2	Sumatra
ZSM03_2	ZSM03	2	460	15.1	modern	2	Sumatra
ZSM03_2	ZSM03	2	468	14.99	modern	2	Sumatra
ZSM03_2	ZSM03	2	477	15.33	modern	2	Sumatra
ZSM03_2	ZSM03	2	485	15.57	modern	2	Sumatra
ZSM03_2	ZSM03	2	493	16.57	modern	2	Sumatra
ZSM03_2	ZSM03	2	501	15.88	modern	2	Sumatra
ZSM03_2	ZSM03	2	509	16.96	modern	2	Sumatra
ZSM03_2	ZSM03	2	517	17.45	modern	2	Sumatra
ZSM03_2	ZSM03	2	526	17.07	modern	2	Sumatra
ZSM03_2	ZSM03	2	534	16.47	modern	2	Sumatra
ZSM03_2	ZSM03	2	542	16.17	modern	2	Sumatra
ZSM03_2	ZSM03	2	550	16.14	modern	2	Sumatra
ZSM03_2	ZSM03	2	556	15.53	modern	2	Sumatra
ZSM03_2	ZSM03	2	561	16.23	modern	2	Sumatra
ZSM03_2	ZSM03	2	567	16.61	modern	2	Sumatra
ZSM03_2	ZSM03	2	573	16.25	modern	2	Sumatra
ZSM03_2	ZSM03	2	578	15.55	modern	2	Sumatra
ZSM03_2	ZSM03	2	584	15.51	modern	2	Sumatra
ZSM03_2	ZSM03	2	590	16.3	modern	2	Sumatra
ZSM03_2	ZSM03	2	595	16.29	modern	2	Sumatra
ZSM03_2	ZSM03	2	601	15.81	modern	2	Sumatra
ZSM03_2	ZSM03	2	606	15.57	modern	2	Sumatra
ZSM03_2	ZSM03	2	612	15.24	modern	2	Sumatra
ZSM03_2	ZSM03	2	618	14.1	modern	2	Sumatra
ZSM03_2	ZSM03	2	623	15.51	modern	2	Sumatra
ZSM03_2	ZSM03	2	629	15.43	modern	2	Sumatra
ZSM03_2	ZSM03	2	635	15.39	modern	2	Sumatra
ZSM03_2	ZSM03	2	640	15.01	modern	2	Sumatra
ZSM03_2	ZSM03	2	646	14.58	modern	2	Sumatra
ZSM03_2	ZSM03	2	652	14.44	modern	2	Sumatra
ZSM03_2	ZSM03	2	657	15	modern	2	Sumatra
ZSM03_2	ZSM03	2	663	15.32	modern	2	Sumatra
ZSM03_2	ZSM03	2	669	14.87	modern	2	Sumatra
ZSM03_2	ZSM03	2	674	15.48	modern	2	Sumatra
ZSM03_2	ZSM03	2	680	15.46	modern	2	Sumatra
ZSM03_2	ZSM03	2	686	15.37	modern	2	Sumatra
ZSM03_2	ZSM03	2	691	15.95	modern	2	Sumatra
ZSM03_2	ZSM03	2	697	15.99	modern	2	Sumatra
ZSM03_2	ZSM03	2	702	15.62	modern	2	Sumatra
ZSM03_2	ZSM03	2	708	15.96	modern	2	Sumatra
ZSM03_2	ZSM03	2	714	15.88	modern	2	Sumatra
ZSM03_2	ZSM03	2	719	15.45	modern	2	Sumatra
ZSM03_2	ZSM03	2	725	15.39	modern	2	Sumatra
ZSM03_2	ZSM03	2	731	14.49	modern	3	Sumatra
ZSM03_2	ZSM03	2	736	14.27	modern	3	Sumatra
ZSM03_2	ZSM03	2	742	15.59	modern	3	Sumatra
ZSM03_2	ZSM03	2	748	15.42	modern	3	Sumatra
ZSM03_2	ZSM03	2	753	15.99	modern	3	Sumatra
ZSM03_2	ZSM03	2	759	14.6	modern	3	Sumatra
ZSM03_2	ZSM03	2	765	14.91	modern	3	Sumatra
ZSM03_2	ZSM03	2	770	15.17	modern	3	Sumatra
ZSM03_2	ZSM03	2	776	15.84	modern	3	Sumatra
ZSM03_2	ZSM03	2	782	16.31	modern	3	Sumatra
ZSM03_2	ZSM03	2	787	16.52	modern	3	Sumatra
ZSM03_2	ZSM03	2	793	15.96	modern	3	Sumatra
ZSM03_2	ZSM03	2	799	15.38	modern	3	Sumatra
ZSM03_2	ZSM03	2	804	14.86	modern	3	Sumatra
ZSM03_2	ZSM03	2	810	14.67	modern	3	Sumatra
ZSM03_2	ZSM03	2	815	14.42	modern	3	Sumatra
ZSM03_2	ZSM03	2	821	13.64	modern	3	Sumatra
ZSM03_2	ZSM03	2	827	13.46	modern	3	Sumatra
ZSM03_2	ZSM03	2	832	13.49	modern	3	Sumatra
ZSM03_2	ZSM03	2	838	13.9	modern	3	Sumatra
ZSM03_2	ZSM03	2	844	15.18	modern	3	Sumatra
ZSM03_2	ZSM03	2	849	14.16	modern	3	Sumatra
ZSM03_2	ZSM03	2	855	14.11	modern	3	Sumatra
ZSM03_2	ZSM03	2	861	14.79	modern	3	Sumatra
ZSM03_2	ZSM03	2	866	14.28	modern	3	Sumatra
ZSM03_2	ZSM03	2	872	14.76	modern	3	Sumatra
ZSM03_2	ZSM03	2	878	15.21	modern	3	Sumatra
ZSM03_2	ZSM03	2	883	14.58	modern	3	Sumatra
ZSM03_2	ZSM03	2	889	15.47	modern	3	Sumatra
ZSM03_2	ZSM03	2	895	16.53	modern	3	Sumatra
ZSM03_2	ZSM03	2	900	16.6	modern	3	Sumatra
ZSM03_2	ZSM03	2	906	16.56	modern	3	Sumatra
ZSM03_2	ZSM03	2	911	16.3	modern	3	Sumatra
ZSM03_2	ZSM03	2	917	16.7	modern	3	Sumatra
ZSM03_2	ZSM03	2	923	16.23	modern	3	Sumatra
ZSM03_2	ZSM03	2	928	14.86	modern	3	Sumatra
ZSM03_2	ZSM03	2	934	16.8	modern	3	Sumatra
ZSM03_2	ZSM03	2	940	16.72	modern	3	Sumatra
ZSM03_2	ZSM03	2	945	14.8	modern	3	Sumatra
ZSM03_2	ZSM03	2	951	15.74	modern	3	Sumatra
ZSM03_2	ZSM03	2	958	15.2	modern	3	Sumatra
ZSM03_2	ZSM03	2	965	14.57	modern	3	Sumatra
ZSM03_2	ZSM03	2	972	15.03	modern	3	Sumatra
ZSM03_2	ZSM03	2	980	16.8	modern	3	Sumatra
ZSM03_2	ZSM03	2	987	16.8	modern	3	Sumatra
ZSM03_2	ZSM03	2	994	15.98	modern	3	Sumatra
ZSM03_2	ZSM03	2	1001	15.06	modern	3	Sumatra
ZSM03_2	ZSM03	2	1008	14.76	modern	3	Sumatra
ZSM03_2	ZSM03	2	1015	15.58	modern	3	Sumatra
ZSM03_2	ZSM03	2	1023	14.8	modern	3	Sumatra
ZSM03_2	ZSM03	2	1030	15.57	modern	3	Sumatra
ZSM03_2	ZSM03	2	1037	15.69	modern	3	Sumatra
ZSM03_2	ZSM03	2	1044	15.24	modern	3	Sumatra
ZSM03_2	ZSM03	2	1051	15.38	modern	3	Sumatra
ZSM03_2	ZSM03	2	1058	13.22	modern	3	Sumatra
ZSM03_2	ZSM03	2	1066	13.76	modern	3	Sumatra
ZSM03_2	ZSM03	2	1073	13.61	modern	3	Sumatra
ZSM03_2	ZSM03	2	1080	14.44	modern	3	Sumatra
ZSM03_2	ZSM03	2	1087	15.01	modern	3	Sumatra
ZSM03_2	ZSM03	2	1094	13.87	modern	3	Sumatra
ZSM04_1	ZSM04	1	0	15.99	modern	1	Sumatra
ZSM04_1	ZSM04	1	8	15.2	modern	1	Sumatra
ZSM04_1	ZSM04	1	14	16.82	modern	1	Sumatra
ZSM04_1	ZSM04	1	20	17.8	modern	1	Sumatra
ZSM04_1	ZSM04	1	26	18	modern	1	Sumatra
ZSM04_1	ZSM04	1	32	16.62	modern	1	Sumatra
ZSM04_1	ZSM04	1	38	16.49	modern	1	Sumatra
ZSM04_1	ZSM04	1	44	16.67	modern	1	Sumatra
ZSM04_1	ZSM04	1	50	17.72	modern	1	Sumatra
ZSM04_1	ZSM04	1	55	18.53	modern	1	Sumatra
ZSM04_1	ZSM04	1	61	17.57	modern	1	Sumatra
ZSM04_1	ZSM04	1	67	16.96	modern	1	Sumatra
ZSM04_1	ZSM04	1	73	17.6	modern	1	Sumatra
ZSM04_1	ZSM04	1	79	18.09	modern	1	Sumatra
ZSM04_1	ZSM04	1	85	17.37	modern	1	Sumatra
ZSM04_1	ZSM04	1	91	16.92	modern	1	Sumatra
ZSM04_1	ZSM04	1	97	17.7	modern	1	Sumatra
ZSM04_1	ZSM04	1	102	16.64	modern	1	Sumatra
ZSM04_1	ZSM04	1	108	17.54	modern	1	Sumatra
ZSM04_1	ZSM04	1	113	17.79	modern	1	Sumatra
ZSM04_1	ZSM04	1	118	17.66	modern	1	Sumatra
ZSM04_1	ZSM04	1	124	17.45	modern	1	Sumatra
ZSM04_1	ZSM04	1	129	17.25	modern	1	Sumatra
ZSM04_1	ZSM04	1	134	17.6	modern	1	Sumatra
ZSM04_1	ZSM04	1	140	18.27	modern	1	Sumatra
ZSM04_1	ZSM04	1	145	17.84	modern	1	Sumatra
ZSM04_1	ZSM04	1	150	17.93	modern	1	Sumatra
ZSM04_1	ZSM04	1	156	17.75	modern	1	Sumatra
ZSM04_1	ZSM04	1	161	17.74	modern	1	Sumatra
ZSM04_1	ZSM04	1	166	17.41	modern	1	Sumatra
ZSM04_1	ZSM04	1	172	17.85	modern	1	Sumatra
ZSM04_1	ZSM04	1	177	18.04	modern	1	Sumatra
ZSM04_1	ZSM04	1	182	17.81	modern	1	Sumatra
ZSM04_1	ZSM04	1	188	17.55	modern	1	Sumatra
ZSM04_1	ZSM04	1	193	17.96	modern	1	Sumatra
ZSM04_1	ZSM04	1	198	16.49	modern	1	Sumatra
ZSM04_1	ZSM04	1	204	17.1	modern	1	Sumatra
ZSM04_1	ZSM04	1	209	16.78	modern	1	Sumatra
ZSM04_1	ZSM04	1	214	16.63	modern	1	Sumatra
ZSM04_1	ZSM04	1	219	16.2	modern	1	Sumatra
ZSM04_1	ZSM04	1	225	15.95	modern	1	Sumatra
ZSM04_1	ZSM04	1	230	17.68	modern	1	Sumatra
ZSM04_1	ZSM04	1	235	16.69	modern	1	Sumatra
ZSM04_1	ZSM04	1	241	17.52	modern	1	Sumatra
ZSM04_1	ZSM04	1	246	17.63	modern	1	Sumatra
ZSM04_1	ZSM04	1	251	16.78	modern	1	Sumatra
ZSM04_1	ZSM04	1	257	16.64	modern	1	Sumatra
ZSM04_1	ZSM04	1	262	15.34	modern	1	Sumatra
ZSM04_1	ZSM04	1	267	17.15	modern	1	Sumatra
ZSM04_1	ZSM04	1	273	17.44	modern	1	Sumatra
ZSM04_1	ZSM04	1	278	17.88	modern	1	Sumatra
ZSM04_1	ZSM04	1	283	17.84	modern	1	Sumatra
ZSM04_1	ZSM04	1	289	17.11	modern	1	Sumatra
ZSM04_1	ZSM04	1	294	18.99	modern	1	Sumatra
ZSM04_1	ZSM04	1	299	18.29	modern	1	Sumatra
ZSM04_1	ZSM04	1	305	17.99	modern	1	Sumatra
ZSM04_1	ZSM04	1	310	17.79	modern	1	Sumatra
ZSM04_1	ZSM04	1	315	17.76	modern	1	Sumatra
ZSM04_1	ZSM04	1	321	17.66	modern	1	Sumatra
ZSM04_1	ZSM04	1	326	17.56	modern	1	Sumatra
ZSM04_1	ZSM04	1	332	17.8	modern	1	Sumatra
ZSM04_1	ZSM04	1	339	18.01	modern	1	Sumatra
ZSM04_1	ZSM04	1	345	17.75	modern	1	Sumatra
ZSM04_1	ZSM04	1	351	17.81	modern	1	Sumatra
ZSM04_1	ZSM04	1	358	17.59	modern	1	Sumatra
ZSM04_1	ZSM04	1	364	17.5	modern	1	Sumatra
ZSM04_1	ZSM04	1	371	17.4	modern	2	Sumatra
ZSM04_1	ZSM04	1	377	17.24	modern	2	Sumatra
ZSM04_1	ZSM04	1	384	17.14	modern	2	Sumatra
ZSM04_1	ZSM04	1	391	17.51	modern	2	Sumatra
ZSM04_1	ZSM04	1	397	18.06	modern	2	Sumatra
ZSM04_1	ZSM04	1	404	16.58	modern	2	Sumatra
ZSM04_1	ZSM04	1	411	17.14	modern	2	Sumatra
ZSM04_1	ZSM04	1	417	17.32	modern	2	Sumatra
ZSM04_1	ZSM04	1	424	18.55	modern	2	Sumatra
ZSM04_1	ZSM04	1	431	17.4	modern	2	Sumatra
ZSM04_1	ZSM04	1	437	18.54	modern	2	Sumatra
ZSM04_1	ZSM04	1	444	19.26	modern	2	Sumatra
ZSM04_1	ZSM04	1	451	18.29	modern	2	Sumatra
ZSM04_1	ZSM04	1	457	17.79	modern	2	Sumatra
ZSM04_1	ZSM04	1	464	16.93	modern	2	Sumatra
ZSM04_1	ZSM04	1	471	18.28	modern	2	Sumatra
ZSM04_1	ZSM04	1	477	17.12	modern	2	Sumatra
ZSM04_1	ZSM04	1	484	17.65	modern	2	Sumatra
ZSM04_1	ZSM04	1	491	17.87	modern	2	Sumatra
ZSM04_1	ZSM04	1	497	17.89	modern	2	Sumatra
ZSM04_1	ZSM04	1	504	17.78	modern	2	Sumatra
ZSM04_1	ZSM04	1	511	17.29	modern	2	Sumatra
ZSM04_1	ZSM04	1	517	16.4	modern	2	Sumatra
ZSM04_1	ZSM04	1	524	15.75	modern	2	Sumatra
ZSM04_1	ZSM04	1	531	16.27	modern	2	Sumatra
ZSM04_1	ZSM04	1	537	16.49	modern	2	Sumatra
ZSM04_1	ZSM04	1	544	16.68	modern	2	Sumatra
ZSM04_1	ZSM04	1	551	16.93	modern	2	Sumatra
ZSM04_1	ZSM04	1	557	16.7	modern	2	Sumatra
ZSM04_1	ZSM04	1	564	15.34	modern	2	Sumatra
ZSM04_1	ZSM04	1	571	14.92	modern	2	Sumatra
ZSM04_1	ZSM04	1	577	15.69	modern	2	Sumatra
ZSM04_1	ZSM04	1	584	14.98	modern	2	Sumatra
ZSM04_1	ZSM04	1	591	15.51	modern	2	Sumatra
ZSM04_1	ZSM04	1	597	14.87	modern	2	Sumatra
ZSM04_1	ZSM04	1	604	13.75	modern	2	Sumatra
ZSM04_1	ZSM04	1	611	13.74	modern	2	Sumatra
ZSM04_1	ZSM04	1	617	14.19	modern	2	Sumatra
ZSM04_1	ZSM04	1	624	14.53	modern	2	Sumatra
ZSM04_1	ZSM04	1	631	14.88	modern	2	Sumatra
ZSM04_1	ZSM04	1	637	15.71	modern	2	Sumatra
ZSM04_1	ZSM04	1	644	15.26	modern	2	Sumatra
ZSM04_1	ZSM04	1	651	15.25	modern	2	Sumatra
ZSM04_1	ZSM04	1	657	16.14	modern	2	Sumatra
ZSM04_1	ZSM04	1	664	16.17	modern	2	Sumatra
ZSM04_1	ZSM04	1	671	16.81	modern	2	Sumatra
ZSM04_1	ZSM04	1	677	16.22	modern	2	Sumatra
ZSM04_1	ZSM04	1	684	16.8	modern	2	Sumatra
ZSM04_1	ZSM04	1	691	16.85	modern	2	Sumatra
ZSM04_1	ZSM04	1	697	16.32	modern	2	Sumatra
ZSM04_1	ZSM04	1	704	17.01	modern	2	Sumatra
ZSM04_1	ZSM04	1	710	17.68	modern	2	Sumatra
ZSM04_1	ZSM04	1	717	17.5	modern	2	Sumatra
ZSM04_1	ZSM04	1	723	17.61	modern	2	Sumatra
ZSM04_1	ZSM04	1	729	16.59	modern	2	Sumatra
ZSM04_2	ZSM04	2	0	16.21	modern	1	Sumatra
ZSM04_2	ZSM04	2	6	16.13	modern	1	Sumatra
ZSM04_2	ZSM04	2	12	16.31	modern	1	Sumatra
ZSM04_2	ZSM04	2	17	16.71	modern	1	Sumatra
ZSM04_2	ZSM04	2	22	16.23	modern	1	Sumatra
ZSM04_2	ZSM04	2	28	15.61	modern	1	Sumatra
ZSM04_2	ZSM04	2	33	14.81	modern	1	Sumatra
ZSM04_2	ZSM04	2	39	13.47	modern	1	Sumatra
ZSM04_2	ZSM04	2	44	14.3	modern	1	Sumatra
ZSM04_2	ZSM04	2	50	14.3	modern	1	Sumatra
ZSM04_2	ZSM04	2	55	15.03	modern	1	Sumatra
ZSM04_2	ZSM04	2	61	13.51	modern	1	Sumatra
ZSM04_2	ZSM04	2	66	14.15	modern	1	Sumatra
ZSM04_2	ZSM04	2	72	14.77	modern	1	Sumatra
ZSM04_2	ZSM04	2	78	15.06	modern	1	Sumatra
ZSM04_2	ZSM04	2	83	15.02	modern	1	Sumatra
ZSM04_2	ZSM04	2	89	16.29	modern	1	Sumatra
ZSM04_2	ZSM04	2	94	16.42	modern	1	Sumatra
ZSM04_2	ZSM04	2	100	16.18	modern	1	Sumatra
ZSM04_2	ZSM04	2	105	15.95	modern	1	Sumatra
ZSM04_2	ZSM04	2	111	15.69	modern	1	Sumatra
ZSM04_2	ZSM04	2	116	16.49	modern	1	Sumatra
ZSM04_2	ZSM04	2	122	16.41	modern	1	Sumatra
ZSM04_2	ZSM04	2	128	17.3	modern	1	Sumatra
ZSM04_2	ZSM04	2	133	17.06	modern	1	Sumatra
ZSM04_2	ZSM04	2	139	17.42	modern	1	Sumatra
ZSM04_2	ZSM04	2	144	16.63	modern	1	Sumatra
ZSM04_2	ZSM04	2	150	17.45	modern	1	Sumatra
ZSM04_2	ZSM04	2	155	17.83	modern	1	Sumatra
ZSM04_2	ZSM04	2	161	17.11	modern	1	Sumatra
ZSM04_2	ZSM04	2	166	17.98	modern	1	Sumatra
ZSM04_2	ZSM04	2	172	18.51	modern	1	Sumatra
ZSM04_2	ZSM04	2	178	17.16	modern	1	Sumatra
ZSM04_2	ZSM04	2	185	18.57	modern	1	Sumatra
ZSM04_2	ZSM04	2	191	18.52	modern	1	Sumatra
ZSM04_2	ZSM04	2	198	18	modern	1	Sumatra
ZSM04_2	ZSM04	2	204	17.49	modern	1	Sumatra
ZSM04_2	ZSM04	2	210	16.45	modern	1	Sumatra
ZSM04_2	ZSM04	2	217	16.39	modern	1	Sumatra
ZSM04_2	ZSM04	2	223	18.37	modern	1	Sumatra
ZSM04_2	ZSM04	2	230	17.99	modern	1	Sumatra
ZSM04_2	ZSM04	2	236	18.75	modern	1	Sumatra
ZSM04_2	ZSM04	2	242	17.05	modern	1	Sumatra
ZSM04_2	ZSM04	2	249	18.24	modern	1	Sumatra
ZSM04_2	ZSM04	2	255	18.63	modern	1	Sumatra
ZSM04_2	ZSM04	2	262	17.94	modern	1	Sumatra
ZSM04_2	ZSM04	2	268	18.94	modern	1	Sumatra
ZSM04_2	ZSM04	2	274	18.45	modern	1	Sumatra
ZSM04_2	ZSM04	2	281	18.23	modern	1	Sumatra
ZSM04_2	ZSM04	2	287	16.78	modern	1	Sumatra
ZSM04_2	ZSM04	2	293	16.61	modern	1	Sumatra
ZSM04_2	ZSM04	2	300	17.79	modern	1	Sumatra
ZSM04_2	ZSM04	2	306	18.24	modern	1	Sumatra
ZSM04_2	ZSM04	2	313	17.57	modern	1	Sumatra
ZSM04_2	ZSM04	2	319	18.93	modern	1	Sumatra
ZSM04_2	ZSM04	2	325	18.85	modern	1	Sumatra
ZSM04_2	ZSM04	2	332	19.15	modern	1	Sumatra
ZSM04_2	ZSM04	2	338	18.75	modern	1	Sumatra
ZSM04_2	ZSM04	2	345	18.98	modern	1	Sumatra
ZSM04_2	ZSM04	2	351	19.14	modern	1	Sumatra
ZSM04_2	ZSM04	2	357	18.96	modern	1	Sumatra
ZSM04_2	ZSM04	2	364	19.11	modern	1	Sumatra
ZSM04_2	ZSM04	2	370	17.71	modern	2	Sumatra
ZSM04_2	ZSM04	2	377	17.81	modern	2	Sumatra
ZSM04_2	ZSM04	2	383	16.06	modern	2	Sumatra
ZSM04_2	ZSM04	2	390	15.97	modern	2	Sumatra
ZSM04_2	ZSM04	2	396	15.83	modern	2	Sumatra
ZSM04_2	ZSM04	2	403	16.82	modern	2	Sumatra
ZSM04_2	ZSM04	2	410	17.55	modern	2	Sumatra
ZSM04_2	ZSM04	2	416	17.82	modern	2	Sumatra
ZSM04_2	ZSM04	2	423	18.08	modern	2	Sumatra
ZSM04_2	ZSM04	2	430	18.78	modern	2	Sumatra
ZSM04_2	ZSM04	2	436	18.38	modern	2	Sumatra
ZSM04_2	ZSM04	2	443	17.79	modern	2	Sumatra
ZSM04_2	ZSM04	2	450	17.76	modern	2	Sumatra
ZSM04_2	ZSM04	2	456	18.79	modern	2	Sumatra
ZSM04_2	ZSM04	2	463	19.02	modern	2	Sumatra
ZSM04_2	ZSM04	2	470	19.47	modern	2	Sumatra
ZSM04_2	ZSM04	2	476	18.58	modern	2	Sumatra
ZSM04_2	ZSM04	2	483	18.22	modern	2	Sumatra
ZSM04_2	ZSM04	2	490	18.05	modern	2	Sumatra
ZSM04_2	ZSM04	2	496	17.91	modern	2	Sumatra
ZSM04_2	ZSM04	2	503	18.94	modern	2	Sumatra
ZSM04_2	ZSM04	2	510	19.5	modern	2	Sumatra
ZSM04_2	ZSM04	2	516	19.06	modern	2	Sumatra
ZSM04_2	ZSM04	2	523	18.29	modern	2	Sumatra
ZSM04_2	ZSM04	2	533	19.15	modern	2	Sumatra
ZSM04_2	ZSM04	2	543	18.88	modern	2	Sumatra
ZSM04_2	ZSM04	2	553	17.06	modern	2	Sumatra
ZSM04_2	ZSM04	2	563	17.5	modern	2	Sumatra
ZSM04_2	ZSM04	2	573	17.29	modern	2	Sumatra
ZSM04_2	ZSM04	2	583	17.95	modern	2	Sumatra
ZSM04_2	ZSM04	2	593	18.72	modern	2	Sumatra
ZSM04_2	ZSM04	2	603	18.9	modern	2	Sumatra
ZSM04_2	ZSM04	2	613	18.67	modern	2	Sumatra
ZSM04_2	ZSM04	2	620	19.58	modern	2	Sumatra
ZSM04_2	ZSM04	2	627	19.17	modern	2	Sumatra
ZSM04_2	ZSM04	2	634	19.46	modern	2	Sumatra
ZSM04_2	ZSM04	2	641	19.18	modern	2	Sumatra
ZSM04_2	ZSM04	2	648	19.63	modern	2	Sumatra
ZSM04_2	ZSM04	2	655	19.7	modern	2	Sumatra
ZSM04_2	ZSM04	2	662	20.2	modern	2	Sumatra
ZSM04_2	ZSM04	2	669	20.05	modern	2	Sumatra
ZSM04_2	ZSM04	2	676	19.55	modern	2	Sumatra
ZSM04_2	ZSM04	2	683	19.86	modern	2	Sumatra
ZSM04_2	ZSM04	2	690	20.38	modern	2	Sumatra
ZSM04_2	ZSM04	2	696	19.73	modern	2	Sumatra
ZSM04_2	ZSM04	2	703	19.5	modern	2	Sumatra
ZSM04_2	ZSM04	2	710	19.32	modern	2	Sumatra
ZSM04_2	ZSM04	2	717	19.46	modern	2	Sumatra
ZSM04_2	ZSM04	2	724	19.34	modern	2	Sumatra
ZSM04_2	ZSM04	2	731	19.08	modern	3	Sumatra
ZSM04_2	ZSM04	2	738	18.35	modern	3	Sumatra
ZSM04_2	ZSM04	2	745	18.65	modern	3	Sumatra
ZSM04_2	ZSM04	2	752	16.47	modern	3	Sumatra
ZSM04_2	ZSM04	2	759	17.19	modern	3	Sumatra
ZSM04_2	ZSM04	2	766	17.27	modern	3	Sumatra
ZSM04_2	ZSM04	2	773	18.56	modern	3	Sumatra
ZSM04_2	ZSM04	2	779	18.44	modern	3	Sumatra
ZSM04_2	ZSM04	2	785	18.22	modern	3	Sumatra
ZSM04_2	ZSM04	2	791	18.44	modern	3	Sumatra
ZSM04_2	ZSM04	2	797	17.95	modern	3	Sumatra
ZSM04_2	ZSM04	2	803	19.16	modern	3	Sumatra
ZSM04_2	ZSM04	2	809	19.28	modern	3	Sumatra
ZSM04_2	ZSM04	2	815	19.8	modern	3	Sumatra
ZSM04_2	ZSM04	2	821	19.77	modern	3	Sumatra
ZSM04_2	ZSM04	2	827	20.11	modern	3	Sumatra
ZSM04_2	ZSM04	2	833	19.68	modern	3	Sumatra
ZSM04_2	ZSM04	2	839	19.87	modern	3	Sumatra
ZSM04_2	ZSM04	2	845	19.31	modern	3	Sumatra
ZSM04_2	ZSM04	2	851	20.05	modern	3	Sumatra
ZSM04_2	ZSM04	2	857	19.78	modern	3	Sumatra
ZSM04_2	ZSM04	2	863	19.92	modern	3	Sumatra
ZSM04_2	ZSM04	2	869	18.73	modern	3	Sumatra
ZSM04_2	ZSM04	2	875	17.61	modern	3	Sumatra
ZSM04_2	ZSM04	2	881	17.76	modern	3	Sumatra
ZSM04_2	ZSM04	2	887	17.46	modern	3	Sumatra
ZSM04_2	ZSM04	2	893	16.96	modern	3	Sumatra
ZSM04_2	ZSM04	2	899	17.9	modern	3	Sumatra
ZSM04_2	ZSM04	2	905	18.23	modern	3	Sumatra
ZSM04_2	ZSM04	2	911	18.38	modern	3	Sumatra
ZSM04_2	ZSM04	2	917	18.62	modern	3	Sumatra
ZSM04_2	ZSM04	2	923	18.51	modern	3	Sumatra
ZSM04_2	ZSM04	2	929	19.34	modern	3	Sumatra
ZSM04_2	ZSM04	2	935	18.96	modern	3	Sumatra
ZSM04_2	ZSM04	2	941	19.6	modern	3	Sumatra
ZSM04_2	ZSM04	2	947	20.08	modern	3	Sumatra
ZSM04_2	ZSM04	2	953	19.31	modern	3	Sumatra
ZSM04_2	ZSM04	2	959	19.92	modern	3	Sumatra
ZSM04_2	ZSM04	2	965	19.74	modern	3	Sumatra
ZSM04_2	ZSM04	2	971	20.09	modern	3	Sumatra
ZSM04_2	ZSM04	2	977	20.53	modern	3	Sumatra
ZSM04_2	ZSM04	2	983	20	modern	3	Sumatra
ZSM04_2	ZSM04	2	989	20	modern	3	Sumatra
ZSM04_2	ZSM04	2	995	19.13	modern	3	Sumatra
ZSM04_2	ZSM04	2	1001	18.9	modern	3	Sumatra
ZSM04_2	ZSM04	2	1007	19.84	modern	3	Sumatra
ZSM04_2	ZSM04	2	1013	19.11	modern	3	Sumatra
ZSM04_2	ZSM04	2	1023	19.59	modern	3	Sumatra
ZSM04_2	ZSM04	2	1034	19.99	modern	3	Sumatra
ZSM04_2	ZSM04	2	1044	19.91	modern	3	Sumatra
ZSM04_2	ZSM04	2	1054	19.21	modern	3	Sumatra
ZSM04_2	ZSM04	2	1065	20.08	modern	3	Sumatra
ZSM04_2	ZSM04	2	1075	19.18	modern	3	Sumatra
ZSM04_2	ZSM04	2	1085	19.38	modern	3	Sumatra
ZSM04_3	ZSM04	3	0	17.46	modern	1	Sumatra
ZSM04_3	ZSM04	3	6.86	17.5	modern	1	Sumatra
ZSM04_3	ZSM04	3	13.71	18.95	modern	1	Sumatra
ZSM04_3	ZSM04	3	20.57	19.18	modern	1	Sumatra
ZSM04_3	ZSM04	3	27.43	19.6	modern	1	Sumatra
ZSM04_3	ZSM04	3	34.29	19.46	modern	1	Sumatra
ZSM04_3	ZSM04	3	41.14	19.49	modern	1	Sumatra
ZSM04_3	ZSM04	3	48	19.65	modern	1	Sumatra
ZSM04_3	ZSM04	3	54.4	18.64	modern	1	Sumatra
ZSM04_3	ZSM04	3	60.8	19.19	modern	1	Sumatra
ZSM04_3	ZSM04	3	67.2	17.94	modern	1	Sumatra
ZSM04_3	ZSM04	3	73.6	17.94	modern	1	Sumatra
ZSM04_3	ZSM04	3	80	18.99	modern	1	Sumatra
ZSM04_3	ZSM04	3	87.75	18.76	modern	1	Sumatra
ZSM04_3	ZSM04	3	95.5	19.09	modern	1	Sumatra
ZSM04_3	ZSM04	3	103.25	18.4	modern	1	Sumatra
ZSM04_3	ZSM04	3	111	18.69	modern	1	Sumatra
ZSM04_3	ZSM04	3	117.42	17.86	modern	1	Sumatra
ZSM04_3	ZSM04	3	123.83	17.44	modern	1	Sumatra
ZSM04_3	ZSM04	3	130.25	16.92	modern	1	Sumatra
ZSM04_3	ZSM04	3	136.67	17.79	modern	1	Sumatra
ZSM04_3	ZSM04	3	143.08	17.3	modern	1	Sumatra
ZSM04_3	ZSM04	3	149.5	16.97	modern	1	Sumatra
ZSM04_3	ZSM04	3	155.92	16.45	modern	1	Sumatra
ZSM04_3	ZSM04	3	162.33	16.66	modern	1	Sumatra
ZSM04_3	ZSM04	3	168.75	18.4	modern	1	Sumatra
ZSM04_3	ZSM04	3	175.17	17.54	modern	1	Sumatra
ZSM04_3	ZSM04	3	181.58	18.48	modern	1	Sumatra
ZSM04_3	ZSM04	3	188	19.12	modern	1	Sumatra
ZSM04_3	ZSM04	3	195.36	18.98	modern	1	Sumatra
ZSM04_3	ZSM04	3	202.71	18.5	modern	1	Sumatra
ZSM04_3	ZSM04	3	210.07	18.89	modern	1	Sumatra
ZSM04_3	ZSM04	3	217.43	18.25	modern	1	Sumatra
ZSM04_3	ZSM04	3	224.79	18.59	modern	1	Sumatra
ZSM04_3	ZSM04	3	232.14	18.97	modern	1	Sumatra
ZSM04_3	ZSM04	3	239.5	19.45	modern	1	Sumatra
ZSM04_3	ZSM04	3	246.86	19.29	modern	1	Sumatra
ZSM04_3	ZSM04	3	254.21	19.19	modern	1	Sumatra
ZSM04_3	ZSM04	3	261.57	19.15	modern	1	Sumatra
ZSM04_3	ZSM04	3	268.93	18.94	modern	1	Sumatra
ZSM04_3	ZSM04	3	276.29	19.25	modern	1	Sumatra
ZSM04_3	ZSM04	3	283.64	19.22	modern	1	Sumatra
ZSM04_3	ZSM04	3	291	19.47	modern	1	Sumatra
ZSM04_3	ZSM04	3	298.12	18.96	modern	1	Sumatra
ZSM04_3	ZSM04	3	305.24	18.6	modern	1	Sumatra
ZSM04_3	ZSM04	3	312.35	17.58	modern	1	Sumatra
ZSM04_3	ZSM04	3	319.47	17.85	modern	1	Sumatra
ZSM04_3	ZSM04	3	326.59	17.59	modern	1	Sumatra
ZSM04_3	ZSM04	3	333.71	17.65	modern	1	Sumatra
ZSM04_3	ZSM04	3	340.82	18.33	modern	1	Sumatra
ZSM04_3	ZSM04	3	347.94	18.38	modern	1	Sumatra
ZSM04_3	ZSM04	3	355.06	18.3	modern	1	Sumatra
ZSM04_3	ZSM04	3	362.18	18.8	modern	1	Sumatra
ZSM04_3	ZSM04	3	369.29	18.86	modern	2	Sumatra
ZSM04_3	ZSM04	3	376.41	19.27	modern	2	Sumatra
ZSM04_3	ZSM04	3	383.53	18.28	modern	2	Sumatra
ZSM04_3	ZSM04	3	390.65	17.99	modern	2	Sumatra
ZSM04_3	ZSM04	3	397.76	17.69	modern	2	Sumatra
ZSM04_3	ZSM04	3	404.88	18.03	modern	2	Sumatra
ZSM04_3	ZSM04	3	412	18.01	modern	2	Sumatra
ZSM04_3	ZSM04	3	423.29	17.71	modern	2	Sumatra
ZSM04_3	ZSM04	3	434.59	17.88	modern	2	Sumatra
ZSM04_3	ZSM04	3	445.88	17.58	modern	2	Sumatra
ZSM04_3	ZSM04	3	457.18	17.61	modern	2	Sumatra
ZSM04_3	ZSM04	3	468.47	17.04	modern	2	Sumatra
ZSM04_3	ZSM04	3	479.76	17.28	modern	2	Sumatra
ZSM04_3	ZSM04	3	491.06	17.02	modern	2	Sumatra
ZSM04_3	ZSM04	3	502.35	18.22	modern	2	Sumatra
ZSM04_3	ZSM04	3	513.65	17.49	modern	2	Sumatra
ZSM04_3	ZSM04	3	524.94	16.37	modern	2	Sumatra
ZSM04_3	ZSM04	3	536.24	16.54	modern	2	Sumatra
ZSM04_3	ZSM04	3	547.53	17.18	modern	2	Sumatra
ZSM04_3	ZSM04	3	558.82	16.4	modern	2	Sumatra
ZSM04_3	ZSM04	3	570.12	16.47	modern	2	Sumatra
ZSM04_3	ZSM04	3	581.41	15.63	modern	2	Sumatra
ZSM04_3	ZSM04	3	592.71	15.91	modern	2	Sumatra
ZSM04_3	ZSM04	3	604	17.33	modern	2	Sumatra
ZSM04_3	ZSM04	3	612.89	17.13	modern	2	Sumatra
ZSM04_3	ZSM04	3	621.78	18.61	modern	2	Sumatra
ZSM04_3	ZSM04	3	630.67	18.63	modern	2	Sumatra
ZSM04_3	ZSM04	3	639.56	18.77	modern	2	Sumatra
ZSM04_3	ZSM04	3	648.44	18.48	modern	2	Sumatra
ZSM04_3	ZSM04	3	657.33	18.51	modern	2	Sumatra
ZSM04_3	ZSM04	3	666.22	18.96	modern	2	Sumatra
ZSM04_3	ZSM04	3	675.11	18.4	modern	2	Sumatra
ZSM04_3	ZSM04	3	684	19	modern	2	Sumatra
ZSM04_3	ZSM04	3	692.89	18.31	modern	2	Sumatra
ZSM04_3	ZSM04	3	701.78	17.88	modern	2	Sumatra
ZSM04_3	ZSM04	3	710.67	18.01	modern	2	Sumatra
ZSM04_3	ZSM04	3	719.56	18.23	modern	2	Sumatra
ZSM04_3	ZSM04	3	728.44	18.4	modern	2	Sumatra
ZSM04_3	ZSM04	3	737.33	17.83	modern	3	Sumatra
ZSM04_3	ZSM04	3	746.22	17.51	modern	3	Sumatra
ZSM04_3	ZSM04	3	755.11	17.94	modern	3	Sumatra
ZSM04_3	ZSM04	3	764	18.17	modern	3	Sumatra
ZSM04_3	ZSM04	3	772.46	18.79	modern	3	Sumatra
ZSM04_3	ZSM04	3	780.92	19.05	modern	3	Sumatra
ZSM04_3	ZSM04	3	789.38	19.14	modern	3	Sumatra
ZSM04_3	ZSM04	3	797.85	18.39	modern	3	Sumatra
ZSM04_3	ZSM04	3	806.31	18.63	modern	3	Sumatra
ZSM04_3	ZSM04	3	814.77	18.6	modern	3	Sumatra
ZSM04_3	ZSM04	3	823.23	17.91	modern	3	Sumatra
ZSM04_3	ZSM04	3	831.69	18.55	modern	3	Sumatra
ZSM04_3	ZSM04	3	840.15	18.42	modern	3	Sumatra
ZSM04_3	ZSM04	3	848.62	18.06	modern	3	Sumatra
ZSM04_3	ZSM04	3	857.08	18.24	modern	3	Sumatra
ZSM04_3	ZSM04	3	865.54	18.17	modern	3	Sumatra
ZSM04_3	ZSM04	3	874	17.45	modern	3	Sumatra
ZSM04_3	ZSM04	3	882.46	17.8	modern	3	Sumatra
ZSM04_3	ZSM04	3	890.92	18.04	modern	3	Sumatra
ZSM04_3	ZSM04	3	899.38	17.67	modern	3	Sumatra
ZSM04_3	ZSM04	3	907.85	17.43	modern	3	Sumatra
ZSM04_3	ZSM04	3	916.31	17.23	modern	3	Sumatra
ZSM04_3	ZSM04	3	924.77	16.42	modern	3	Sumatra
ZSM04_3	ZSM04	3	933.23	16.71	modern	3	Sumatra
ZSM04_3	ZSM04	3	941.69	16.45	modern	3	Sumatra
ZSM04_3	ZSM04	3	950.15	16.66	modern	3	Sumatra
ZSM04_3	ZSM04	3	958.62	17.73	modern	3	Sumatra
ZSM04_3	ZSM04	3	967.08	17.16	modern	3	Sumatra
ZSM04_3	ZSM04	3	975.54	18.1	modern	3	Sumatra
ZSM04_3	ZSM04	3	984	17.33	modern	3	Sumatra
ZSM04_3	ZSM04	3	990.36	17.8	modern	3	Sumatra
ZSM04_3	ZSM04	3	996.73	17.61	modern	3	Sumatra
ZSM04_3	ZSM04	3	1003.09	17.87	modern	3	Sumatra
ZSM04_3	ZSM04	3	1009.45	18.42	modern	3	Sumatra
ZSM04_3	ZSM04	3	1015.82	17.94	modern	3	Sumatra
ZSM04_3	ZSM04	3	1022.18	17.21	modern	3	Sumatra
ZSM04_3	ZSM04	3	1028.55	18.64	modern	3	Sumatra
ZSM04_3	ZSM04	3	1034.91	18.61	modern	3	Sumatra
ZSM04_3	ZSM04	3	1041.27	18.93	modern	3	Sumatra
ZSM04_3	ZSM04	3	1047.64	18.92	modern	3	Sumatra
ZSM04_3	ZSM04	3	1054	19.29	modern	3	Sumatra
ZSM04_3	ZSM04	3	1060.36	18.63	modern	3	Sumatra
ZSM04_3	ZSM04	3	1066.73	19.04	modern	3	Sumatra
ZSM04_3	ZSM04	3	1073.09	18.84	modern	3	Sumatra
ZSM04_3	ZSM04	3	1079.45	18.38	modern	3	Sumatra
ZSM04_3	ZSM04	3	1085.82	17.99	modern	3	Sumatra
ZSM04_3	ZSM04	3	1092.18	18.3	modern	3	Sumatra
LIA01	LIA01		0	18.07	fossil	1	Sumatra
LIA01	LIA01		7	17.65	fossil	1	Sumatra
LIA01	LIA01		14	17.52	fossil	1	Sumatra
LIA01	LIA01		21	18.56	fossil	1	Sumatra
LIA01	LIA01		28	18.95	fossil	1	Sumatra
LIA01	LIA01		34	19.58	fossil	1	Sumatra
LIA01	LIA01		41	18.79	fossil	1	Sumatra
LIA01	LIA01		47	18.44	fossil	1	Sumatra
LIA01	LIA01		53	18.23	fossil	1	Sumatra
LIA01	LIA01		60	17.58	fossil	1	Sumatra
LIA01	LIA01		66	17.52	fossil	1	Sumatra
LIA01	LIA01		72	17.28	fossil	1	Sumatra
LIA01	LIA01		79	18.05	fossil	1	Sumatra
LIA01	LIA01		85	17.54	fossil	1	Sumatra
LIA01	LIA01		91	17.98	fossil	1	Sumatra
LIA01	LIA01		98	17.33	fossil	1	Sumatra
LIA01	LIA01		104	18.06	fossil	1	Sumatra
LIA01	LIA01		110	18.04	fossil	1	Sumatra
LIA01	LIA01		117	17.24	fossil	1	Sumatra
LIA01	LIA01		123	17.64	fossil	1	Sumatra
LIA01	LIA01		129	18.14	fossil	1	Sumatra
LIA01	LIA01		136	16.99	fossil	1	Sumatra
LIA01	LIA01		142	17.81	fossil	1	Sumatra
LIA01	LIA01		148	17.48	fossil	1	Sumatra
LIA01	LIA01		155	17.28	fossil	1	Sumatra
LIA01	LIA01		161	16.29	fossil	1	Sumatra
LIA01	LIA01		167	17.85	fossil	1	Sumatra
LIA01	LIA01		174	16.9	fossil	1	Sumatra
LIA01	LIA01		180	17.19	fossil	1	Sumatra
LIA01	LIA01		186	16.84	fossil	1	Sumatra
LIA01	LIA01		193	16.83	fossil	1	Sumatra
LIA01	LIA01		199	16.17	fossil	1	Sumatra
LIA01	LIA01		205	15.74	fossil	1	Sumatra
LIA01	LIA01		212	15.99	fossil	1	Sumatra
LIA01	LIA01		218	15.81	fossil	1	Sumatra
LIA01	LIA01		224	16.27	fossil	1	Sumatra
LIA01	LIA01		231	15.55	fossil	1	Sumatra
LIA01	LIA01		237	15.83	fossil	1	Sumatra
LIA01	LIA01		243	17.5	fossil	1	Sumatra
LIA01	LIA01		250	16.86	fossil	1	Sumatra
LIA01	LIA01		256	17.08	fossil	1	Sumatra
LIA01	LIA01		262	16.15	fossil	1	Sumatra
LIA01	LIA01		269	16.32	fossil	1	Sumatra
LIA01	LIA01		275	16.2	fossil	1	Sumatra
LIA01	LIA01		281	15.46	fossil	1	Sumatra
LIA01	LIA01		288	16.03	fossil	1	Sumatra
LIA01	LIA01		294	16.27	fossil	1	Sumatra
LIA01	LIA01		304	15.94	fossil	1	Sumatra
LIA01	LIA01		315	16.41	fossil	1	Sumatra
LIA01	LIA01		325	16.89	fossil	1	Sumatra
LIA01	LIA01		335	16.86	fossil	1	Sumatra
LIA01	LIA01		346	16.8	fossil	1	Sumatra
LIA01	LIA01		356	16.71	fossil	1	Sumatra
LIA01	LIA01		366	16.21	fossil	2	Sumatra
LIA01	LIA01		377	16.27	fossil	2	Sumatra
LIA01	LIA01		387	16.34	fossil	2	Sumatra
LIA01	LIA01		397	16.32	fossil	2	Sumatra
LIA01	LIA01		408	16.1	fossil	2	Sumatra
LIA01	LIA01		418	16.83	fossil	2	Sumatra
LIA01	LIA01		428	17.93	fossil	2	Sumatra
LIA01	LIA01		439	17.86	fossil	2	Sumatra
LIA01	LIA01		449	17.71	fossil	2	Sumatra
LIA01	LIA01		459	18.33	fossil	2	Sumatra
LIA01	LIA01		470	18.54	fossil	2	Sumatra
LIA01	LIA01		480	17.53	fossil	2	Sumatra
LIA01	LIA01		490	17.82	fossil	2	Sumatra
LIA01	LIA01		501	17.24	fossil	2	Sumatra
LIA01	LIA01		511	18.72	fossil	2	Sumatra
LIA01	LIA01		521	18.12	fossil	2	Sumatra
LIA01	LIA01		532	18.08	fossil	2	Sumatra
LIA01	LIA01		542	18.34	fossil	2	Sumatra
LIA01	LIA01		552	18.53	fossil	2	Sumatra
LIA01	LIA01		563	16.28	fossil	2	Sumatra
LIA01	LIA01		573	16.74	fossil	2	Sumatra
LIA01	LIA01		582	17.74	fossil	2	Sumatra
LIA01	LIA01		591	17.36	fossil	2	Sumatra
LIA01	LIA01		600	17.22	fossil	2	Sumatra
LIA01	LIA01		609	17.25	fossil	2	Sumatra
LIA01	LIA01		618	17.43	fossil	2	Sumatra
LIA01	LIA01		627	17.54	fossil	2	Sumatra
LIA01	LIA01		636	17.8	fossil	2	Sumatra
LIA01	LIA01		643	17.86	fossil	2	Sumatra
LIA01	LIA01		651	17.88	fossil	2	Sumatra
LIA01	LIA01		658	18.69	fossil	2	Sumatra
LIA01	LIA01		666	17.96	fossil	2	Sumatra
LIA01	LIA01		673	17.49	fossil	2	Sumatra
LIA01	LIA01		680	18.14	fossil	2	Sumatra
LIA01	LIA01		688	17.48	fossil	2	Sumatra
LIA01	LIA01		695	18.33	fossil	2	Sumatra
LIA01	LIA01		703	18.12	fossil	2	Sumatra
LIA01	LIA01		710	18.52	fossil	2	Sumatra
LIA01	LIA01		718	17.51	fossil	2	Sumatra
LIA01	LIA01		725	18.04	fossil	2	Sumatra
LIA01	LIA01		732	18.44	fossil	3	Sumatra
LIA01	LIA01		740	18	fossil	3	Sumatra
LIA01	LIA01		747	18.16	fossil	3	Sumatra
LIA01	LIA01		755	17.95	fossil	3	Sumatra
LIA01	LIA01		762	18.48	fossil	3	Sumatra
LIA01	LIA01		769	18.39	fossil	3	Sumatra
LIA01	LIA01		776	18.09	fossil	3	Sumatra
LIA01	LIA01		782	18.53	fossil	3	Sumatra
LIA01	LIA01		789	18.77	fossil	3	Sumatra
LIA01	LIA01		796	18.97	fossil	3	Sumatra
LIA01	LIA01		803	19.45	fossil	3	Sumatra
LIA01	LIA01		809	19.93	fossil	3	Sumatra
LIA01	LIA01		816	18.91	fossil	3	Sumatra
LIA01	LIA01		823	19.6	fossil	3	Sumatra
LIA01	LIA01		830	19.69	fossil	3	Sumatra
LIA01	LIA01		836	19.92	fossil	3	Sumatra
LIA01	LIA01		843	19.74	fossil	3	Sumatra
LIA01	LIA01		848	19.79	fossil	3	Sumatra
LIA01	LIA01		854	19.33	fossil	3	Sumatra
LIA01	LIA01		859	19.09	fossil	3	Sumatra
LIA01	LIA01		865	18.6	fossil	3	Sumatra
LIA01	LIA01		870	18.17	fossil	3	Sumatra
LIA01	LIA01		875	18.14	fossil	3	Sumatra
LIA01	LIA01		881	18.66	fossil	3	Sumatra
LIA01	LIA01		886	18.05	fossil	3	Sumatra
LIA01	LIA01		892	18.01	fossil	3	Sumatra
LIA01	LIA01		897	18.34	fossil	3	Sumatra
LIA01	LIA01		903	18.6	fossil	3	Sumatra
LIA01	LIA01		908	19.02	fossil	3	Sumatra
LIA01	LIA01		913	19.01	fossil	3	Sumatra
LIA01	LIA01		919	19.43	fossil	3	Sumatra
LIA01	LIA01		924	18.89	fossil	3	Sumatra
LIA01	LIA01		930	18.67	fossil	3	Sumatra
LIA01	LIA01		935	18.54	fossil	3	Sumatra
LIA01	LIA01		940	17.89	fossil	3	Sumatra
LIA01	LIA01		946	18.01	fossil	3	Sumatra
LIA01	LIA01		951	18.39	fossil	3	Sumatra
LIA01	LIA01		957	18.6	fossil	3	Sumatra
LIA01	LIA01		962	18.57	fossil	3	Sumatra
LIA01	LIA01		967	18.07	fossil	3	Sumatra
LIA01	LIA01		973	17.43	fossil	3	Sumatra
LIA01	LIA01		978	18.28	fossil	3	Sumatra
LIA01	LIA01		984	18	fossil	3	Sumatra
LIA01	LIA01		989	17.06	fossil	3	Sumatra
LIA01	LIA01		994	16.95	fossil	3	Sumatra
LIA01	LIA01		1000	15.09	fossil	3	Sumatra
LIA01	LIA01		1005	15.35	fossil	3	Sumatra
LIA01	LIA01		1011	16.05	fossil	3	Sumatra
LIA01	LIA01		1016	16.34	fossil	3	Sumatra
LIA01	LIA01		1022	16.39	fossil	3	Sumatra
LIA01	LIA01		1027	16.68	fossil	3	Sumatra
LIA01	LIA01		1032	16.51	fossil	3	Sumatra
LIA01	LIA01		1038	16.88	fossil	3	Sumatra
LIA01	LIA01		1043	16.64	fossil	3	Sumatra
LIA01	LIA01		1049	16.87	fossil	3	Sumatra
LIA01	LIA01		1054	16.52	fossil	3	Sumatra
LIA01	LIA01		1059	16.39	fossil	3	Sumatra
LIA01	LIA01		1065	16.06	fossil	3	Sumatra
LIA01	LIA01		1070	16.62	fossil	3	Sumatra
LIA01	LIA01		1076	16.37	fossil	3	Sumatra
LIA01	LIA01		1081	17.55	fossil	3	Sumatra
LIA02	LIA02		0	17.26	fossil	1	Sumatra
LIA02	LIA02		4	18.17	fossil	1	Sumatra
LIA02	LIA02		8	19.39	fossil	1	Sumatra
LIA02	LIA02		13	19.59	fossil	1	Sumatra
LIA02	LIA02		17	19.67	fossil	1	Sumatra
LIA02	LIA02		21	19.45	fossil	1	Sumatra
LIA02	LIA02		25	18.22	fossil	1	Sumatra
LIA02	LIA02		30	19.17	fossil	1	Sumatra
LIA02	LIA02		34	17.41	fossil	1	Sumatra
LIA02	LIA02		38	18.69	fossil	1	Sumatra
LIA02	LIA02		42	19.32	fossil	1	Sumatra
LIA02	LIA02		46	19.07	fossil	1	Sumatra
LIA02	LIA02		51	19.03	fossil	1	Sumatra
LIA02	LIA02		55	18.88	fossil	1	Sumatra
LIA02	LIA02		59	19.27	fossil	1	Sumatra
LIA02	LIA02		65	19.17	fossil	1	Sumatra
LIA02	LIA02		71	18.73	fossil	1	Sumatra
LIA02	LIA02		77	18.51	fossil	1	Sumatra
LIA02	LIA02		83	18.47	fossil	1	Sumatra
LIA02	LIA02		88	18.58	fossil	1	Sumatra
LIA02	LIA02		94	19.03	fossil	1	Sumatra
LIA02	LIA02		100	18.31	fossil	1	Sumatra
LIA02	LIA02		106	18.04	fossil	1	Sumatra
LIA02	LIA02		112	18.54	fossil	1	Sumatra
LIA02	LIA02		118	17.97	fossil	1	Sumatra
LIA02	LIA02		124	17.69	fossil	1	Sumatra
LIA02	LIA02		130	17.77	fossil	1	Sumatra
LIA02	LIA02		136	17.82	fossil	1	Sumatra
LIA02	LIA02		142	19.04	fossil	1	Sumatra
LIA02	LIA02		147	18.72	fossil	1	Sumatra
LIA02	LIA02		153	19.07	fossil	1	Sumatra
LIA02	LIA02		159	18.83	fossil	1	Sumatra
LIA02	LIA02		165	18.16	fossil	1	Sumatra
LIA02	LIA02		171	17.95	fossil	1	Sumatra
LIA02	LIA02		177	17.86	fossil	1	Sumatra
LIA02	LIA02		183	18	fossil	1	Sumatra
LIA02	LIA02		189	17.97	fossil	1	Sumatra
LIA02	LIA02		195	18.06	fossil	1	Sumatra
LIA02	LIA02		201	18.45	fossil	1	Sumatra
LIA02	LIA02		206	18.09	fossil	1	Sumatra
LIA02	LIA02		212	18.35	fossil	1	Sumatra
LIA02	LIA02		218	18.06	fossil	1	Sumatra
LIA02	LIA02		224	18.25	fossil	1	Sumatra
LIA02	LIA02		230	18.03	fossil	1	Sumatra
LIA02	LIA02		236	17.98	fossil	1	Sumatra
LIA02	LIA02		242	17.68	fossil	1	Sumatra
LIA02	LIA02		248	18.04	fossil	1	Sumatra
LIA02	LIA02		254	17.91	fossil	1	Sumatra
LIA02	LIA02		259	17.19	fossil	1	Sumatra
LIA02	LIA02		265	17.86	fossil	1	Sumatra
LIA02	LIA02		271	18.06	fossil	1	Sumatra
LIA02	LIA02		277	17.7	fossil	1	Sumatra
LIA02	LIA02		283	17.52	fossil	1	Sumatra
LIA02	LIA02		289	18.18	fossil	1	Sumatra
LIA02	LIA02		295	17.94	fossil	1	Sumatra
LIA02	LIA02		301	17.82	fossil	1	Sumatra
LIA02	LIA02		307	18.34	fossil	1	Sumatra
LIA02	LIA02		313	17.61	fossil	1	Sumatra
LIA02	LIA02		318	17.43	fossil	1	Sumatra
LIA02	LIA02		324	16.86	fossil	1	Sumatra
LIA02	LIA02		330	17.17	fossil	1	Sumatra
LIA02	LIA02		336	16.89	fossil	1	Sumatra
LIA02	LIA02		342	16.97	fossil	1	Sumatra
LIA02	LIA02		349	16.6	fossil	1	Sumatra
LIA02	LIA02		356	17.21	fossil	1	Sumatra
LIA02	LIA02		363	16.34	fossil	1	Sumatra
LIA02	LIA02		370	16.87	fossil	2	Sumatra
LIA02	LIA02		377	16.54	fossil	2	Sumatra
LIA02	LIA02		384	17.26	fossil	2	Sumatra
LIA02	LIA02		391	17.61	fossil	2	Sumatra
LIA02	LIA02		398	16.58	fossil	2	Sumatra
LIA02	LIA02		405	17.32	fossil	2	Sumatra
LIA02	LIA02		412	17.16	fossil	2	Sumatra
LIA02	LIA02		419	17.2	fossil	2	Sumatra
LIA02	LIA02		426	17.28	fossil	2	Sumatra
LIA02	LIA02		433	18.61	fossil	2	Sumatra
LIA02	LIA02		440	17.49	fossil	2	Sumatra
LIA02	LIA02		447	16.73	fossil	2	Sumatra
LIA02	LIA02		454	17.88	fossil	2	Sumatra
LIA02	LIA02		461	18.65	fossil	2	Sumatra
LIA02	LIA02		468	19.21	fossil	2	Sumatra
LIA02	LIA02		476	17.27	fossil	2	Sumatra
LIA02	LIA02		483	18.8	fossil	2	Sumatra
LIA02	LIA02		490	18.6	fossil	2	Sumatra
LIA02	LIA02		496	18.78	fossil	2	Sumatra
LIA02	LIA02		503	19.19	fossil	2	Sumatra
LIA02	LIA02		509	18.92	fossil	2	Sumatra
LIA02	LIA02		516	18.86	fossil	2	Sumatra
LIA02	LIA02		522	18.86	fossil	2	Sumatra
LIA02	LIA02		528	18.76	fossil	2	Sumatra
LIA02	LIA02		535	18.54	fossil	2	Sumatra
LIA02	LIA02		541	19	fossil	2	Sumatra
LIA02	LIA02		547	17.97	fossil	2	Sumatra
LIA02	LIA02		554	17.74	fossil	2	Sumatra
LIA02	LIA02		560	18.08	fossil	2	Sumatra
LIA02	LIA02		567	18.5	fossil	2	Sumatra
LIA02	LIA02		573	18.46	fossil	2	Sumatra
LIA02	LIA02		580	18.03	fossil	2	Sumatra
LIA02	LIA02		586	17.79	fossil	2	Sumatra
LIA02	LIA02		593	18.43	fossil	2	Sumatra
LIA02	LIA02		599	18.6	fossil	2	Sumatra
LIA02	LIA02		606	18.64	fossil	2	Sumatra
LIA02	LIA02		612	18.73	fossil	2	Sumatra
LIA02	LIA02		619	18.74	fossil	2	Sumatra
LIA02	LIA02		625	18.66	fossil	2	Sumatra
LIA02	LIA02		632	18.21	fossil	2	Sumatra
LIA02	LIA02		638	19.06	fossil	2	Sumatra
LIA02	LIA02		645	18.57	fossil	2	Sumatra
LIA02	LIA02		653	17.72	fossil	2	Sumatra
LIA02	LIA02		660	16.87	fossil	2	Sumatra
LIA02	LIA02		668	17.73	fossil	2	Sumatra
LIA02	LIA02		676	17.19	fossil	2	Sumatra
LIA02	LIA02		684	17.12	fossil	2	Sumatra
LIA02	LIA02		691	16.45	fossil	2	Sumatra
LIA02	LIA02		699	16.23	fossil	2	Sumatra
LIA02	LIA02		707	15.69	fossil	2	Sumatra
LIA02	LIA02		714	16.3	fossil	2	Sumatra
LIA02	LIA02		722	16.31	fossil	2	Sumatra
LIA02	LIA02		730	16.72	fossil	2	Sumatra
LIA02	LIA02		738	18.02	fossil	3	Sumatra
LIA02	LIA02		745	17.28	fossil	3	Sumatra
LIA02	LIA02		753	16.49	fossil	3	Sumatra
LIA02	LIA02		760	17.29	fossil	3	Sumatra
LIA02	LIA02		766	16.87	fossil	3	Sumatra
LIA02	LIA02		773	17.31	fossil	3	Sumatra
LIA02	LIA02		779	17.41	fossil	3	Sumatra
LIA02	LIA02		786	17.05	fossil	3	Sumatra
LIA02	LIA02		792	16.86	fossil	3	Sumatra
LIA02	LIA02		799	16.69	fossil	3	Sumatra
LIA02	LIA02		806	16.13	fossil	3	Sumatra
LIA02	LIA02		812	16.35	fossil	3	Sumatra
LIA02	LIA02		819	17.03	fossil	3	Sumatra
LIA02	LIA02		825	18.72	fossil	3	Sumatra
LIA02	LIA02		832	17.08	fossil	3	Sumatra
LIA02	LIA02		838	17.41	fossil	3	Sumatra
LIA02	LIA02		845	18.92	fossil	3	Sumatra
LIA02	LIA02		852	19.3	fossil	3	Sumatra
LIA02	LIA02		858	19.79	fossil	3	Sumatra
LIA02	LIA02		865	19.64	fossil	3	Sumatra
LIA02	LIA02		871	19.33	fossil	3	Sumatra
LIA02	LIA02		878	19.49	fossil	3	Sumatra
LIA02	LIA02		885	18.59	fossil	3	Sumatra
LIA02	LIA02		891	18.38	fossil	3	Sumatra
LIA02	LIA02		898	18.11	fossil	3	Sumatra
LIA02	LIA02		904	18.21	fossil	3	Sumatra
LIA02	LIA02		911	17.82	fossil	3	Sumatra
LIA02	LIA02		917	18.51	fossil	3	Sumatra
LIA02	LIA02		924	18.49	fossil	3	Sumatra
LIA02	LIA02		932	18.36	fossil	3	Sumatra
LIA02	LIA02		939	19.04	fossil	3	Sumatra
LIA02	LIA02		947	18.87	fossil	3	Sumatra
LIA02	LIA02		954	19.06	fossil	3	Sumatra
LIA02	LIA02		962	19.46	fossil	3	Sumatra
LIA02	LIA02		969	18.89	fossil	3	Sumatra
LIA02	LIA02		977	18.39	fossil	3	Sumatra
LIA02	LIA02		985	18.2	fossil	3	Sumatra
LIA02	LIA02		992	18.13	fossil	3	Sumatra
LIA02	LIA02		1000	18.27	fossil	3	Sumatra
LIA02	LIA02		1007	19.03	fossil	3	Sumatra
LIA02	LIA02		1015	18.01	fossil	3	Sumatra
LIA02	LIA02		1023	17.75	fossil	3	Sumatra
LIA02	LIA02		1030	17.58	fossil	3	Sumatra
LIA02	LIA02		1038	17.46	fossil	3	Sumatra
LIA02	LIA02		1045	17.43	fossil	3	Sumatra
LIA02	LIA02		1053	17.76	fossil	3	Sumatra
LIA02	LIA02		1060	17.16	fossil	3	Sumatra
LIA02	LIA02		1068	16.29	fossil	3	Sumatra
LIA02	LIA02		1076	16.62	fossil	3	Sumatra
LIA02	LIA02		1084	16.98	fossil	3	Sumatra
LIA02	LIA02		1092	17.14	fossil	3	Sumatra
NIA01	NIA01		0	21.57	fossil	1	Borneo
NIA01	NIA01		7	21.35	fossil	1	Borneo
NIA01	NIA01		14	22.41	fossil	1	Borneo
NIA01	NIA01		21	23.66	fossil	1	Borneo
NIA01	NIA01		28	24.22	fossil	1	Borneo
NIA01	NIA01		35	21.34	fossil	1	Borneo
NIA01	NIA01		42	21.38	fossil	1	Borneo
NIA01	NIA01		48	19.82	fossil	1	Borneo
NIA01	NIA01		55	19.25	fossil	1	Borneo
NIA01	NIA01		62	20.12	fossil	1	Borneo
NIA01	NIA01		69	20.01	fossil	1	Borneo
NIA01	NIA01		76	22.54	fossil	1	Borneo
NIA01	NIA01		83	20.67	fossil	1	Borneo
NIA01	NIA01		89	20.35	fossil	1	Borneo
NIA01	NIA01		95	20.81	fossil	1	Borneo
NIA01	NIA01		101	20.71	fossil	1	Borneo
NIA01	NIA01		107	20.46	fossil	1	Borneo
NIA01	NIA01		113	20.55	fossil	1	Borneo
NIA01	NIA01		119	17.77	fossil	1	Borneo
NIA01	NIA01		125	18.77	fossil	1	Borneo
NIA01	NIA01		131	18.97	fossil	1	Borneo
NIA01	NIA01		137	18.43	fossil	1	Borneo
NIA01	NIA01		143	19.41	fossil	1	Borneo
NIA01	NIA01		149	20.13	fossil	1	Borneo
NIA01	NIA01		156	19.86	fossil	1	Borneo
NIA01	NIA01		162	19.49	fossil	1	Borneo
NIA01	NIA01		168	20.29	fossil	1	Borneo
NIA01	NIA01		174	20.1	fossil	1	Borneo
NIA01	NIA01		180	20.21	fossil	1	Borneo
NIA01	NIA01		186	20.13	fossil	1	Borneo
NIA01	NIA01		192	20.19	fossil	1	Borneo
NIA01	NIA01		198	20.11	fossil	1	Borneo
NIA01	NIA01		204	19.75	fossil	1	Borneo
NIA01	NIA01		210	19.58	fossil	1	Borneo
NIA01	NIA01		216	18.36	fossil	1	Borneo
NIA01	NIA01		222	18.81	fossil	1	Borneo
NIA01	NIA01		228	18.18	fossil	1	Borneo
NIA01	NIA01		237	18.36	fossil	1	Borneo
NIA01	NIA01		246	22.84	fossil	1	Borneo
NIA01	NIA01		255	22.32	fossil	1	Borneo
NIA01	NIA01		264	23.21	fossil	1	Borneo
NIA01	NIA01		272	23.02	fossil	1	Borneo
NIA01	NIA01		281	22.99	fossil	1	Borneo
NIA01	NIA01		290	24.81	fossil	1	Borneo
NIA01	NIA01		299	23.68	fossil	1	Borneo
NIA01	NIA01		308	22.21	fossil	1	Borneo
NIA01	NIA01		317	23.41	fossil	1	Borneo
NIA01	NIA01		326	22.32	fossil	1	Borneo
NIA01	NIA01		335	21.84	fossil	1	Borneo
NIA01	NIA01		344	22.84	fossil	1	Borneo
NIA01	NIA01		353	22.82	fossil	1	Borneo
NIA01	NIA01		361	23.14	fossil	1	Borneo
NIA01	NIA01		370	23	fossil	2	Borneo
NIA01	NIA01		379	22.27	fossil	2	Borneo
NIA01	NIA01		388	21.99	fossil	2	Borneo
NIA01	NIA01		397	21.73	fossil	2	Borneo
NIA01	NIA01		404	21.65	fossil	2	Borneo
NIA01	NIA01		412	21.02	fossil	2	Borneo
NIA01	NIA01		419	20.16	fossil	2	Borneo
NIA01	NIA01		426	20.59	fossil	2	Borneo
NIA01	NIA01		433	19.87	fossil	2	Borneo
NIA01	NIA01		441	20.76	fossil	2	Borneo
NIA01	NIA01		448	20.62	fossil	2	Borneo
NIA01	NIA01		455	20.6	fossil	2	Borneo
NIA01	NIA01		462	20.09	fossil	2	Borneo
NIA01	NIA01		470	19.89	fossil	2	Borneo
NIA01	NIA01		477	19.69	fossil	2	Borneo
NIA01	NIA01		484	19.72	fossil	2	Borneo
NIA01	NIA01		491	19.4	fossil	2	Borneo
NIA01	NIA01		498	19.41	fossil	2	Borneo
NIA01	NIA01		505	19.23	fossil	2	Borneo
NIA01	NIA01		511	19.37	fossil	2	Borneo
NIA01	NIA01		518	19.45	fossil	2	Borneo
NIA01	NIA01		525	19.59	fossil	2	Borneo
NIA01	NIA01		532	19.35	fossil	2	Borneo
NIA01	NIA01		539	19.58	fossil	2	Borneo
NIA01	NIA01		546	19.66	fossil	2	Borneo
NIA01	NIA01		553	18.91	fossil	2	Borneo
NIA01	NIA01		559	18.11	fossil	2	Borneo
NIA01	NIA01		566	18	fossil	2	Borneo
NIA01	NIA01		573	18.67	fossil	2	Borneo
NIA01	NIA01		580	18.32	fossil	2	Borneo
NIA01	NIA01		586	18.81	fossil	2	Borneo
NIA01	NIA01		592	18.78	fossil	2	Borneo
NIA01	NIA01		599	17.59	fossil	2	Borneo
NIA01	NIA01		605	19.53	fossil	2	Borneo
NIA01	NIA01		611	20.01	fossil	2	Borneo
NIA01	NIA01		617	20.25	fossil	2	Borneo
NIA01	NIA01		623	20.7	fossil	2	Borneo
NIA01	NIA01		630	20.77	fossil	2	Borneo
NIA01	NIA01		636	22.36	fossil	2	Borneo
NIA01	NIA01		642	21.7	fossil	2	Borneo
NIA01	NIA01		648	21.76	fossil	2	Borneo
NIA01	NIA01		654	20.7	fossil	2	Borneo
NIA01	NIA01		661	21.02	fossil	2	Borneo
NIA01	NIA01		667	20.38	fossil	2	Borneo
NIA01	NIA01		673	20.32	fossil	2	Borneo
NIA01	NIA01		679	20.86	fossil	2	Borneo
NIA01	NIA01		685	20.74	fossil	2	Borneo
NIA01	NIA01		692	21.34	fossil	2	Borneo
NIA01	NIA01		698	21.94	fossil	2	Borneo
NIA01	NIA01		704	20.96	fossil	2	Borneo
NIA01	NIA01		710	20.47	fossil	2	Borneo
[truncated: 394 more rows]
